1 Regulation of *Jacobaea vulgaris* by  
2 varied cutting and restoration measures

3  
4 Regulation of *Jacobaea vulgaris*

5 Henrike Möhler\*<sup>1</sup>, Tim Diekötter<sup>1</sup>, Tobias W. Donath<sup>1</sup>

6 <sup>1</sup>Department of Landscape Ecology, Institute for Natural Resource Conservation, Kiel  
7 University, Kiel, Germany

8 \* corresponding author

9 E-Mail: [hmoehler@ecology.uni-kiel.de](mailto:hmoehler@ecology.uni-kiel.de)

10

11

## 12 Abstract

13 The growth of the noxious grassland weed *Jacobaea vulgaris* Gaertn. in pastures is a threat to  
14 grazing animals. This is especially true when it dominates vegetation cover, which often occurs  
15 on non-intensively used pastures that are managed with the nature-conservation goal to  
16 maintain and promote biodiversity. Thus, we wanted to find management techniques to reduce  
17 *J. vulgaris* without harming the floral biodiversity on the pastures.

18 We tested six different mechanical and cultural methods to reduce the presence and spread of  
19 *J. vulgaris*. Seven study sites in Northern Germany (Schleswig-Holstein) were treated with  
20 various measurements, including: milling and seeding, hay transfer, mowing regimes at  
21 different times and frequencies, and combinations of mowing and seeding.

22 Our results show that cutting within the bloom of the plant at the end of June and again four  
23 weeks later, when the plant is in its second bloom was the most effective treatment in reducing  
24 *J. vulgaris* abundance. This was the only treatment leading to a significant reduction in  
25 population growth rate and density without reducing surrounding plant species richness.

26 The study reveals that management of *J. vulgaris* in non-intensively used pastures is possible,  
27 while preserving species-rich grasslands.

## 28 Keywords

29 grassland restoration, grassland management, weed control, population dynamics, biodiversity  
30 conservation, pasture, *Senecio jacobaea*, ragwort

31

## 32 Introduction

33 *Jacobaea vulgaris* is a widespread noxious grassland weed native to Eurasia, and invasive in  
34 North America, New Zealand, and Australia (1). As the plant's pyrrolizidine alkaloids pose a  
35 health risk to cattle when consumed (2), the control of *J. vulgaris* is a primary management  
36 goal of many farmers and in some countries even prescribed in their legislation (3). In intensive

37 grasslands, high fertilizer input, high cutting frequency, and chemical weed management  
38 precludes the occurrence of *J. vulgaris*. It's control is challenging, though, in low input  
39 grasslands that are managed for high plant and animal diversity, yet prone to massive *J. vulgaris*  
40 spread (4). Taking this into account, we tested management strategies that aim at controlling *J.*  
41 *vulgaris* without jeopardizing wild plant diversity.

42 Several studies have aimed to find ways to manage *J. vulgaris* (3, 6–8). Some of these focused  
43 on chemical control measures (3), intensified fertilization (4, 9) or the introduction of  
44 antagonists to reduce *J. vulgaris* density (10). While these measures can be very effective, their  
45 negative side-effects precludes their widespread application, especially in non-intensively  
46 managed species-rich grasslands (4, 11) or are more promising in the weed's non-native range  
47 (6). Studies on alternative *J. vulgaris* management measures that are compatible with nature  
48 conservation goals, are scarce (12).

49 Therefore, we tested the effects of cutting regimes at different phenological stages of *J. vulgaris*  
50 and restoration measures to increase plant species diversity as well as a combination of both on  
51 the development of *J. vulgaris* populations.

52 Studies of the effectiveness of cutting on *J. vulgaris* populations in grasslands are scarce (12)  
53 and so far ambiguous in their findings. While 13 (2008) showed that frequent cutting decreases  
54 *J. vulgaris* abundance and fertility, other studies find that the species can re-grow within a few  
55 weeks after being damaged or may switch to vegetative reproduction forming multiple rosettes  
56 (2, 14). Thus, slashing or mowing per se may not be sufficient for weed control (15).

57 In order to increase the effectiveness of cutting in suppressing *J. vulgaris*, the frequency and  
58 timing of cutting is essential because the proportion of nutrients and energy invested in different  
59 plant parts varies among life-stages (16, 17). As *J. vulgaris* grows back quickly after cutting  
60 (14), a second cut may be necessary before the second bloom. While this cutting regime may  
61 prevent generative reproduction, it may induce vegetative reproduction, clonal growth or a

62 switch to a perennial life cycle (1). Since *J. vulgaris* usually dies off after seed production (18),  
63 cutting before seed dispersal may be another option that may not only prevent vegetative re-  
64 growth but also seed dispersal.

65 In addition to an adapted cutting regime, sowing other species can suppress weeds (19).  
66 According to the biotic resistance hypotheses (20), increased plant diversity may also increase  
67 plant community resistance against future invasion (21). Several studies showed that the  
68 invasion of problematic plant species can be prevented through increasing plant species  
69 diversity (e.g. 22, 23).

70 If species enrichment proves an effective measure in weed control, it could be combined with  
71 the re-establishment of species-rich grassland communities, which have declined dramatically  
72 (24). Various techniques of species enrichment are commonly applied in restoration (25). While  
73 seeding seed mixtures is frequently applied for the re-creation of grasslands (25), transferring  
74 freshly cut, seed-containing biomass from species-rich grasslands (green hay) is another  
75 effective method to restore grasslands (26). When green hay is transferred, disturbance to an  
76 existing sward has been shown to enhance seedling establishment (27). Under high seed  
77 pressure from *J. vulgaris*, however, sward disturbance will also enhance the weed's  
78 establishment (9); thus, slot drilling and broadcast sowing without sward disturbance may be  
79 promising techniques (28) to combine with the adapted cutting regimes to reduce establishment  
80 and growth of *J. vulgaris*. Therefore, we also applied a combination of cutting regimes and  
81 species-enrichment measures, where the cutting regime is thought to weaken *J. vulgaris*  
82 individuals and the increased plant diversity reduces new establishment.

83 Contrary to deliberate action against *J. vulgaris*, there is indication that waiting for its natural  
84 disappearance might be another promising management approach (14, 29, 30). 1 (1957), have  
85 observed a hump-shaped population development of *J. vulgaris*, with a population boom  
86 followed by sudden decline. In addition, Bezemer et al. (2006a) reported a natural decrease in

87 *J. vulgaris*. Nonetheless, management to reduce *J. vulgaris* is essential to avoid threat to  
88 domestic animals.

89 The objective of our study was to find the optimal treatment, timing, and frequency for  
90 grassland management on non-intensive pastures that leads to a maximal weed reduction and a  
91 minimal loss of co-occurring vegetation. We studied six different management options for five  
92 years.

93 We addressed the following research questions:

- 94 1. Which treatment is most effective in reducing the abundance and population growth rate of  
95 *J. vulgaris*?
- 96 2. What are the effects of the different treatments on the co-occurring grassland vegetation?

## 97 Material and Methods

98

### 99 Study species

100 *Jacobaea vulgaris* (Asteraceae; syn. *Senecio jacobaea* L.) is native to Eurasia, but invasive in  
101 many other countries (1). Despite being regarded as a character species of mesophilic pastures  
102 (31) in its native range, its poisonousness leads to its rating as a noxious pasture weed  
103 worldwide (3). Its occurrence is common in open disturbed sites, such as ruderal sites, fallow  
104 land, and temperate non-intensively managed grasslands (1, 2).

105 *J. vulgaris* is a mostly monocarpic perennial herb (Fig. 2). After seed germination in late  
106 summer or autumn, the rosette overwinters and flowers the next year, with a flowering peak at  
107 the end of July. Flowering can be delayed if site conditions are not optimal or if first flowers  
108 are damaged by herbivory or cutting (14).

109 *J. vulgaris* has several biological traits supporting its spread and hampering its regulation. It  
110 produces thousands of wind-dispersed seeds and grows quickly at suitable sites, making it a  
111 typical pioneer species of ruderal or disturbed sites (1). Seeds show a high germination rate

112 (about 80 %) and are long-term persistent (32). The plant tolerates disturbance during different  
113 life stages, e.g. an early cut of the inflorescence does not preclude post-ripening of vital seeds  
114 (33) and disturbance or injury to the vegetation bud promotes regrowth through roots and crown  
115 buds (3).

## 116 117 Study sites

118 In 2015, we began management experiments on seven pastures with presence of *J. vulgaris*.  
119 Sites were situated in two geographical regions (Moraine, Hill land) in Northern Germany (see  
120 Fig. 1, Table S1, Supporting Information) on sandy soils (34).

121

122 **Fig. 1** – Study area in Schleswig-Holstein, Northern Germany.

123

124 At least 5 out of 7 sites were formerly used as arable land. The current nature-conservation  
125 grazing scheme applied by the managing nature conservation organization aims at maintaining  
126 and promoting biodiversity (35). At all sites, *J. vulgaris* abundance was very high with on  
127 average  $60 \pm 5$  *J. vulgaris* plants per square meter (excluding seedlings) at the experiments start.

## 128 Study design

129 Six different grassland management schemes, two measures of mowing and species enrichment,  
130 two cutting treatments, and two combinations of seeding (as a measure of species-enrichment)  
131 and cutting, against a control with no measures applied (Table 1), were assessed in a randomized  
132 block design. On each of the seven study sites, each of the six treatments was applied within an  
133 area of 90 m<sup>2</sup> (block). All study sites were under non-intensive grazing during the study. To  
134 minimize edge effects, *J. vulgaris* and the co-occurring vegetation were assessed within three  
135 permanently marked nine m<sup>2</sup> plots in the central part of each block.

136 Table 1 Treatments

| Name           | Description                                                                   |
|----------------|-------------------------------------------------------------------------------|
| Biodiversity 1 | Milling and broadcast-seeding in 2015, then left untouched in following years |

|                |                                                                                                                        |
|----------------|------------------------------------------------------------------------------------------------------------------------|
| Biodiversity 2 | Milling and green hay (26) spread over the ground in 2015, then left untouched in following years                      |
| Flower cut     | Flowers cut before each bloom (end of June and beginning of August) in every year (2015-2019)                          |
| Seed cut       | Flowers cut before seeds disperse (mid/end of July) in every year (2015-2019)                                          |
| Combination 1  | Mowing and drill-seeding in 2015, then left untouched in following years                                               |
| Combination 2  | Mowing and broadcast-seeding in first two years (2015-2016), mowing for whole study period (2015-2019 mid/end of July) |
| Control        | No treatment, still grazed as all other treatments                                                                     |

137

138 In both *biodiversity* treatments, the plots were milled to a depth of 30 cm prior to seed addition  
139 in autumn 2015. For the *biodiversity 1* treatment, 5 g/m<sup>2</sup> of the “fertile meadow mixture”  
140 (Rieger-Hoffmann seed supplier) containing 20 species (30 % forbs 70 % grasses) commonly  
141 found and collected in northeast Germany (see Table S2, Supporting Information) were sown  
142 and rolled. For the *biodiversity 2* treatment, freshly cut plant material was transferred from  
143 species-rich donor-sites nearby. Thereafter, cattle were fenced out of the seed-enriched area  
144 some weeks to allow seedling establishment. For the *combination* treatments, 1.5 g/m<sup>2</sup> of the  
145 seed mixture mentioned above (see Table S2, Supporting Information) was sown by slit drill  
146 (*combination 1*) or by hand in two subsequent years (2015, 2016; *combination 2*) after mowing  
147 the standing vegetation. Sowing took place in September and October 2015 and in October  
148 2016 for *combination 2*. At the second sowing date the *combination 2* received some additional  
149 seeds of other characteristic grassland species. Cuttings remained on the plots. Mowing took  
150 place between June and August every year from 2015 to 2019. The *flower cut* treatment was  
151 cut in late June and before the second blooming peaked. The *seed cut* treatment was cut before  
152 seed dispersal in mid to late July. Cutting of the *combination 2* treatment in late July was  
153 continued annually until the end of the experiment in July 2019.

154 **Data sampling**

155 Within the central one square meter of the permanently marked plots, the position of each *J.*  
 156 *vulgaris* individual were recorded every year between 2015 and 2019. Recorded *J. vulgaris*  
 157 individuals were assigned to one of three life stages: (i) seedling (S), (ii) rosettes (with one  
 158 single rosette (SR) or multiple rosettes (MR)), and (iii) generative plants (G) with flower stalks.  
 159 Altogether, 40 466 individuals for one or more transitions were monitored, summing up to  
 160 100 199 observations.

161 The initial species composition of the vegetation was recorded from June to August 2015. In  
 162 subsequent years, vegetation assessment according to the Braun-Blanquet scale (36) took place  
 163 between May and August. Red List status of recorded species was noted (37). Target species  
 164 were defined as character species for species-rich grasslands in Northern Germany according  
 165 to 38 (2019).

166  
 167 **Transition matrix model and population dynamics**

168 Based on the frequency distribution of recorded life stages, a 4x4-transition matrix (based on  
 169 S, SR, MR, and G) was constructed for each study site, treatment, and year (Fig 2). Each matrix  
 170 element ( $a_{ij}$ ) was calculated from the number of individuals in stage  $j$  in year  $t$  that passed to  
 171 stage  $i$  in year  $t + 1$ , divided by the column total of stage  $j$  (39). Fecundity was determined by  
 172 dividing the number of generative plants (G) in year  $t$  by the number of seedlings (S) in the  
 173 following year  $t + 1$  (40).

174

|         |           | Stage at time $t$ |           |           |          |
|---------|-----------|-------------------|-----------|-----------|----------|
| Stage   |           | <b>S</b>          | <b>SR</b> | <b>MR</b> | <b>G</b> |
| at time | <b>S</b>  | 0                 | 0         | 0         | $F_{14}$ |
| $t + 1$ | <b>SR</b> | $G_{21}$          | $S_{22}$  | $R_{23}$  | $R_{24}$ |
|         | <b>MR</b> | $G_{31}$          | $G_{32}$  | $S_{33}$  | $R_{34}$ |



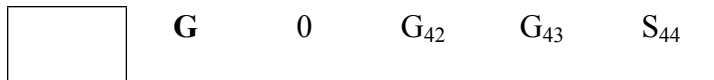

175 **Fig. 2** – Life cycle graph for *J. vulgaris* and the corresponding transition matrix. Boxes indicate  
176 life stages, arrows represent the possible transitions between them, and letters show the  
177 connection between each transition and its matrix entry (F, fecundity; G, growth; S, stasis).

178

179 The population growth rate was calculated by pooling all plants of the single life stages for all  
180 study sites for each treatment and year. A 95 % confidence interval was established by  
181 bootstrapping the data (5 000 iterations) for each treatment and year (39) in R (41). For fertility  
182 values, we used mean fertilities per treatment and year.

183 Life-table response experiments (LTREs) were conducted using matrices based on vital rates  
184 to analyze the contribution of different vital rates to the difference in the population growth rate  
185 ( $\Delta\lambda$ ) between each treatment and the control (39). Each matrix element is a product of the lower-  
186 level vital rates: survival ( $\sigma_j$ ), stasis ( $\gamma_{i=j}$ ), growth ( $\gamma_{i>j}$ ), retrogression ( $\gamma_{i<j}$ ), and reproduction  
187 ( $\Phi_{ij}$ ) (42). All analyses were performed with the program POPTOOLS version 3.2 (43).

188

### 189 **Statistical Analysis**

190 Population growth was analyzed using mixed effect models (44, 45). The first model included  
191 a pseudo factor as a fixed factor. This pseudo factor consisted of the actual factors *treatment*  
192 and *year*. This was necessary because the actual factors *treatment* and *year* are not orthogonal  
193 for population growth. The second model included the fixed factors *treatment* and *year* without  
194 an interaction effect. The two models were compared to test for significance of the interactive  
195 effect. As the interactive effect was not significant, the second model with *study site* as an  
196 additional random factor was used for further analyses. Residuals were visually checked for  
197 normality and heteroscedasticity. Based on this model, a Pseudo  $R^2$  was calculated (46) and an  
198 analysis of variances (ANOVA) conducted, followed by multiple contrast tests (e.g., see 47) in

199 order to compare the influence of factors levels of *treatment* and *year*, respectively. To test if  
200 treatments differed from the control, we used a Dunnett test.

201 *Numbers of plants and their life stages* in response to *year* were studied using analysis of  
202 variances (ANOVA) for each treatment. For each study site, average numbers of plants per  
203 square-meter from the three plots per block were used. To identify differences between the  
204 treatments, years, and life stages, Tukey's HSD (honestly significant difference) post hoc test  
205 was applied.

206 To examine species diversity, we calculated species richness and evenness (48). To investigate  
207 whether species composition fluctuated more strongly in the treatments compared to the control  
208 plots, the temporal species turnover rate for each population and treatment was calculated as  
209  $(NR + D)/(n_t + n_{t+1})$  (49). NR denotes the number of species per plot that were newly recorded  
210 in year  $t + 1$  but did not occur on the plot in year  $t$ . D is the number of species that disappeared  
211 during the transition from year  $t$  to year  $t + 1$ .  $n_t$  and  $n_{t+1}$  denote the species numbers in year  $t$   
212 and  $t + 1$ , respectively.

213 All statistical analyses were calculated using the statistical software R (41).

214

## 215 Results

### 216 Population dynamics of *J. vulgaris*

#### 217 Abundance and life stages

218 The abundance of *J. vulgaris* individuals did not differ significantly between treatments;  
219 however, a trend was identified (ANOVA  $F_{6, 204} = 1.955$   $P = 0.073$ ). Year had a significant  
220 effect on *J. vulgaris* abundance ( $F_{4, 204} = 6.6478$ ,  $P < 0.0001$ ).

221 The seven treatments led to three distinct response patterns (Fig. 3). Both *biodiversity*  
222 treatments showed an initial decline in *J. vulgaris* abundance but a rebound after the fourth  
223 year. The *combination* treatments, the *seed cut* treatment, and the control showed an oscillating  
224 pattern with falling and rising *J. vulgaris* abundance every other year. Under all treatments,  
225 *J. vulgaris* abundance was on average lower in the fourth year of the study compared to the first

226 year. Similarly, the abundance of rosettes and flowering plants was slightly lower at the end of  
227 the study in 2019 compared to its start in 2015 under all treatments ( $52 \pm 8$  in 2019 vs.  $60 \pm 5$   
228 in 2015). Only the *flower cut* treatment led to a continuous decrease in *J. vulgaris* abundance,  
229 while statistically this was only a trend ( $F_{4,30} = 2.558$ ,  $P = 0.059$ ).

230

231 **Fig. 3 Abundance of *J. vulgaris* plants per one squaremeter according to treatment and**  
232 **year.** In the box plots, middle lines represent the median, boxes represent the first and third  
233 quartiles, lower and upper bars represent the minimum and the maximum, and points represent  
234 outliers (i.e. points above 1.5 SD). There were no significant differences between treatments  
235 (TukeyHSD,  $P \leq 0.05$ ).

236

237 Fluctuations in *J. vulgaris* abundance in non-milled sites between years were mainly driven by  
238 differences in the numbers of vegetative plants, while the number of flowering plants showed  
239 an almost continuous decrease during the study period (see Fig. 4; ANOVA  $F_{4,65} = 10.46$ ,  $P <$   
240  $0.0001$ ). This decrease was significant within *biodiversity* treatments, *seed cut*, and *combination*  
241 *I* treatments.

242

243 **Fig. 4 Abundance of flowering *J. vulgaris* plants per one squaremeter according to**  
244 **treatment and year.** In the box plots, middle lines represent the median, boxes represent the  
245 first and third quartiles, lower and upper bars represent the minimum and the maximum, and  
246 points represent outliers (i.e. points above 1.5 SD). Different letters indicate significant  
247 differences between the years within the treatments (TukeyHSD,  $P \leq 0.05$ ).

248

## 249 Population growth and Life-Table-Response-Experiments

250 Population growth rates did not differ significantly between treatments ( $F_{6,153} = 1.541$ ,  $P = 0.$   
251  $168$ ). For the *flower cut* treatment, the population growth rate was significantly below one  
252 throughout the study period, indicating a constant decline in population size (Fig. 5). All other  
253 treatments did not lead to a constant decline in population sizes but showed considerable  
254 variation between years. Interestingly, years with relatively high population growth rates were  
255 followed by years with lower population growth rates, which led to a significant year effect on  
256  $\lambda$  (ANOVA  $F_{3, 158} = 15.35064$ ,  $P < 0.0001$ ). The substantial population growth setback in 2018  
257 (year 17-18) was prominent.

258 ANOVA of our mixed model including *treatment* and *year* as main factors and *study site* as a  
259 random factor revealed that *year* rather than *treatment*, mainly influenced the survival and  
260 population growth rates of *J. vulgaris*. In the dry year of 2018, density and abundance decreased  
261 but increased even more in the subsequent moist year 2019. Consequently, there was a positive  
262 linear relationship between the amount of rainfall and the abundance of seedlings found in the  
263 study plots (regression  $y = -55.5360 + 1.0612 * N$ ,  $F_1 = 17.57$ ,  $P < 0.0001$ ).

264

265 **Fig. 5 Population growth rates for treatments according to years.** Shown are the means  $\pm$   
266 95 % CI. Treatments did not differ significantly. Constant population is marked with the line  
267  $\lambda = 1$ .

268

269 The LTRE analysis showed that differences in the population growth rate ( $\Delta\lambda$ ) between each  
270 treatment and the control were mainly the result of differences in generative reproduction and  
271 survival (Fig. 6). The analysis also demonstrates that the influence of vital rates on population  
272 growth in the *flower cut* treatment is very different from all other treatments. Here stasis and

273 retrogression have a considerable impact on positive population growth, as these vital rates are  
274 much higher than in the control.

275

276

277 **Fig. 6.** Contribution of vital rates to the difference in population growth rate ( $\Delta\lambda$ ) between the control and other treatments (bio I, *biodiversity 1*; bio  
278 II, *biodiversity 2*; cutflower, *flower cut* treatment; combi I, *combination* treatment 1; combi II, *combination 2*; cutseed, *seed cut* treatment) in the  
279 pooled *J. vulgaris* population, as determined by LTRE (life-table response experiment) analysis. Bar sections above zero display the summed positive  
280 contributions and bar sections below zero the summed negative contributions.

281 The elasticity analysis revealed that three main transitions are crucial for population growth: i)  
282 the transition from seedling to single rosette ( $G_{21}$ ), ii) from single rosette to flowering plant  
283 ( $G_{24}$ ), and iii) from flowering plant to seedling ( $F_{14}$ ). The importance of these transitions did  
284 not differ between treatment or year. All transitions contributed equally to population growth.

285

### 286 [Changes in vegetation composition](#)

287 The overall mean number of vascular plants per one square meter was  $23 \pm 1$  in 2015 and  $29 \pm$   
288  $1$  in 2019. Species richness differed between treatments (ANOVA  $F_{6,210} = 3.204$ ,  $P < 0.005$ ).  
289 The seed addition in *biodiversity* and *combination* treatments led to species enrichment. About  
290 five more plant species were found on plots with seed addition (*biodiversity* and *combination*)  
291 compared to control plots. In the last year of the experiment only species richness in the  
292 *combination* treatments was significantly higher than in the control treatment. All management  
293 measures but the control enhanced species richness (Fig. 7).

294

295 **Fig. 7 Species richness according to year and treatment.** For explanation of the boxplot,  
296 refer to Figure 3. Different letters indicate significant differences ( $P \leq 0.05$ ; Tukey HSD)  
297 between years within one treatment. Dashed lines indicate mean species richness in 2015 (lower  
298 line) and 2019 (upper line).

299

300 Richness patterns varied over the study period (Fig. 7) and were significantly different between  
301 treatments and years (ANOVA treatment  $F_{6,168} = 3.893$ ,  $P < 0.005$ ; year  $F_{3,168} = 3.813$ ,  $P <$   
302  $0.05$ ). While in the first and second years after seed addition, the *biodiversity* treatments resulted  
303 in the highest species richness, in 2018 and 2019 the *combination* treatments were the most  
304 species rich. During all study years, the control treatment resulted in the lowest species richness,  
305 also only significantly different from the *biodiversity* treatments. Both cutting regimes had  
306 slightly but not significantly higher species richness compared to the control. Throughout the

307 study period, species evenness was highest under treatments that included mowing (*flower* and  
308 *seed cut, combination 2*).

309 The number of red-listed plant species differed significantly between treatments (ANOVA  
310  $F_{6, 189} = 31.08$ ,  $P < 0.0001$ ). Most endangered plants occurred in the *biodiversity 1* treatment  
311 (mean: three endangered species per one square meter vs. zero or one species in the control).  
312 Plants categorized as characteristic grassland species were most numerous in the *biodiversity 1*  
313 treatment, followed by hay transfer (*biodiversity 2*) and *combination* treatments with mowing  
314 and sowing (Fig. 8). *Biodiversity* treatments and the *combination 2* treatment led to significantly  
315 higher numbers of endangered plants than in the control.

316

317 **Fig. 8 Percentage of value species per year and treatment.** For explanation of the boxplot,  
318 refer to Figure 3. Different letters indicate significant differences ( $P \leq 0.05$ ; Tukey HSD)  
319 between years within one treatment.

320

321 Turnover rates of the vegetation differed significantly between treatments (ANOVA  $F_{6, 140} =$   
322  $16.74$ ,  $P < 0.0001$ ) and were significantly highest under treatments with mowing in combination  
323 with seeding or plant material transfer, i.e. *biodiversity 1* and 2, followed by *combination 2*,  
324 which combined to sowing impulses and mowing (Fig. S3, Supporting Information). Turnover  
325 rates of pure cutting treatments, *combination 1*, and the control were significantly lower and  
326 did not differ from each other. The percentage of target species contributing to the turnover rate  
327 was highest for *biodiversity 1* ( $37 \pm 0.02$  %) and *combination 2* ( $35 \pm 0.03$  %) and lower for  
328 *combination 1* ( $29 \pm 0.02$  %) even though these differences were not significant.

329



## 330 Discussion

### 331 Effects of regulation measures on *J. vulgaris*

332 The *biodiversity* treatments led to a drastic decrease in *J. vulgaris* abundance in the first two to  
333 three years (Fig. 3). The decrease was especially pronounced, significant, and lasting in the  
334 *biodiversity 1* treatment for the flowering stage (Fig. 4). Although the general abundance  
335 decline in the *biodiversity* treatments after the first years was not significant, the results concur  
336 with previous findings that *J. vulgaris* densities decline as a result of sowing grassland species  
337 into the sward after soil disturbance (50, 51).

338 Declines in *J. vulgaris* abundance following milling, seem counterintuitive since establishment  
339 of *J. vulgaris* is favored by soil disturbance (9). Consequently, soil disturbance was combined  
340 with sowing grassland species. Lawson et al. (2004) revealed a reduction in *J. vulgaris* densities  
341 in the first year after ploughing and sowing grassland species. Similarly, 50 (2006) reported  
342 reduced *J. vulgaris* abundance on those plots that were sown with grassland species compared  
343 to control plots without seed addition over a period of eight years.

344 According to the biotic resistance theory (Levine et al. 2004), invasibility in species-rich  
345 systems should be lower than in species poor ones. While this might be true in the long run, at  
346 shorter temporal scales, species-rich plant communities may also be invaded if open soil patches  
347 remain that favor the establishment of light-demanding pioneers such as *J. vulgaris* (14). Thus,  
348 we cannot confirm the results of Bezemer et al. (2006) and Lawson et al. (2004) that *J. vulgaris*  
349 density declines after ploughing and sowing as we did not find lower *J. vulgaris* numbers in  
350 sown plots compared to untreated plots in the four years after milling and sowing took place.  
351 We assume that this is due to differences in the initial setting of the study by Bezemer et al.  
352 (2006) and our study. While in our study, grazed grassland was the control baseline, i.e. cattle  
353 caused continuous small-scale disturbances throughout the study, Bezemer et al. (2006) began  
354 with an un-vegetated control, which was mown once a year. Repopulation of the early  
355 successional *J. vulgaris* might not have been prevented as around 33% higher bare ground cover

356 compared to control plots (Fig. S4, Supporting Information) offered enough establishment  
357 opportunities for the weed.

358 The LTRE analysis showed that the population growth on milled sites was due to an increased  
359 generative reproduction (Fig. 5). The increase in *J. vulgaris* might also have occurred due to  
360 changes in soil biota after milling. While soil biota are thought to suppress *J. vulgaris* growth  
361 over time (50, 52), soil disturbance might set soil biota back to an earlier developmental state,  
362 where negative effects on *J. vulgaris* are less pronounced. 53 (2006) reported increased growth  
363 of invaders in tilled soil due to changes in the soil community, which supports this assumption.

364 Besides milling, mowing is a commonly used tool to control noxious weeds (19). It can prevent  
365 seed production, reduce carbohydrate reserves, and give advantages to desirable perennial  
366 grasses. Our results show that the success of mowing depends on timing and frequency. While  
367 mowing once before seed dispersal failed to reduce the population growth rate or abundance of  
368 *J. vulgaris*, mowing twice shortly before the bloom resulted in a growth rate significantly and  
369 constantly below one and constantly decreased *J. vulgaris* abundance. This concurs with the  
370 finding that the optimal time for mowing noxious weeds is the flowering stage before seed  
371 development (19). This too is true for *J. vulgaris*, as the highest proportion of nutrients and  
372 energy is channeled into aboveground organs during bloom (Otzen 1977).

373 According to the pattern of population growth in the *flower cut* treatment, the LTRE analysis  
374 showed that the lower population growth rate in *flower cut* compared to the *control* treatment  
375 was mainly caused by the suppression of generative reproduction, the most important means of  
376 mass colonization for pioneer plants (1).

377 Additionally, repeated mowing leads to a denser sward and thus less open soil patches, which  
378 prevents emergence of *J. vulgaris* seedlings. Furthermore, we found that continuous mowing  
379 twice a year for more than two years is needed to drive down *J. vulgaris* abundance. Otherwise,

380 high numbers of plants either remaining in their life stage or becoming rosettes so that prolific  
381 blooming will only be postponed.

382 In accordance with our results, 13 (2008) found that cutting *J. vulgaris* early and at least two  
383 times significantly weakens the plant. The LTRE analysis showed that impeding the fertility  
384 transition, i.e. the production of seeds, was the decisive property of the *flower cut* treatment  
385 causing *J. vulgaris* to decline, particularly in 2017, two years after the treatment began. The  
386 need to mow repeatedly over several years for successful weed control is also mirrored in the  
387 estimated survival rates in the *flower cut* treatment.

388 The LTRE-analysis showed that survival of *J. vulgaris* plants in the *flower cut* treatment in  
389 2016/17 was higher than in the control. This is in accordance with findings of 54 (1989), who  
390 found that plants defoliated by the butterfly *Tyria jacobaeae* die less than those setting seeds  
391 probably due to higher resource investments involved in seed production than in regrowth.  
392 Cumulative effects of constant mowing regimes were also found by 55 (2014). Increased  
393 retrogression and stasis of plants that are ready to bloom in the next year reflects this mechanism  
394 in our LTRE analysis.

395 Finding the optimal cutting date after which *J. vulgaris* will not bloom again and produce vital  
396 seeds is difficult. Contrary to the effects of repeated cutting (*flower cut*), cutting once before  
397 seeds disperse did not influence population dynamics or *J. vulgaris* abundance. Even though  
398 more flowering plants completed their lifecycle and died, new seedlings from post-ripened  
399 seeds compensated this mortality. In *J. vulgaris*, the first germinable seeds occur with the first  
400 withered capitula (33). Eisele suggest cutting *J. vulgaris*, when 10 % of the capitula begin to  
401 flower within half of the generative plants. However, under field conditions where the  
402 phenology of *J. vulgaris* is not synchronous, this stage is rather difficult to assess and is close  
403 to the emergence of the first germinable seeds. If cut too early however, enough resources  
404 remain for vegetative reproduction (56).

405 Rosettes and seedlings constituted the largest proportion of *J. vulgaris* plants, which is in  
406 accordance with 13 (2008), who also found that 50% of *J. vulgaris* populations are made up of  
407 rosettes. Yet, *J. vulgaris* population structure and growth rates were highly variable across  
408 years, such that year had a stronger effect on population growth than management. We observed  
409 an oscillating pattern with falling and rising *J. vulgaris* abundance every other year in *seed cut*,  
410 *combination*, and *control* treatments (Fig. 3). Extreme weather conditions, such as  
411 exceptionally hot or dry summers, affect population growth through immediate effects on vital  
412 rates (57, 58). The low rainfall in 2018 caused a decline in the population growth rate from  
413 2017 to 2018 and a density decrease at all sites under all treatments. In accordance with our  
414 general observation of increased seedling numbers when rainfall was higher, we found that the  
415 population growth rate from 2018 to 2019 increased again after increased precipitation in 2019  
416 (Fig. 5). *J. vulgaris* populations probably profited from more light on the ground from 2018 to  
417 2019 because the sward was less dense after the drought of 2018. 54 (1989) found that plant  
418 recruitment was microsite limited and depended very much on weather and activity of rabbits,  
419 boars, and moles, i.e. enough light and water for germination (14). In our experiment, trampling  
420 and grazing from cattle can create windows of opportunity for *J. vulgaris* establishment (59).  
421 Our analysis showed that all transitions from seedling to rosette, from rosette to flowering plant,  
422 and from flowering plant to seedling contribute equally to population growth rate. This is in  
423 accordance with 60 (2012), who found that transitions from rosette to flowering plant and from  
424 flowering plant to rosette were especially important for population growth.

425  
426

#### 427 [Development of species richness and vegetation composition](#)

428 Botanical richness in our study either remained constant or increased. Thus, none of the  
429 measures applied to regulate *J. vulgaris* counteracted the goal of preserving species richness.  
430 Highest species richness occurred in the combination treatment of seeding and cutting  
431 (*combination 2*), where two sowing impulses with slightly different seed mixtures were set and

432 resident species and newly sown species coexisted, whereas species diversity in *control*  
433 treatments stayed lowest. *Combination 2* also reached high evenness-indices, as did the *flower*  
434 *cut* treatment. In general, evenness was significantly higher under mowing regimes (*flower cut*,  
435 *seed cut*, and *combination 2*), in which more species were able to establish due to reduced  
436 competition by dominant grasses (61). Diversity patterns of the treatments changed over time.  
437 *Biodiversity* treatments were most species rich in the first two years after milling and seeding  
438 or green hay transfer. However, species numbers and cover of target species in *biodiversity*  
439 treatments declined after the third year (Fig. 7 - 8). Other studies also showed that initially high  
440 species numbers in sown treatments decreased after some years (50, 62, 63). One reason for  
441 this decrease is that ruderal species and former arable weeds occur initially after milling and  
442 vanish later on (27, 64). Therefore, species turnover was highest in mill-sow treatments  
443 (*biodiversity* treatments 1 and 2) and seed-addition treatments (*combination* treatments 1 and  
444 2), whereas turnover in the pure cutting treatments (*flower* and *seed cut*) did not differ from the  
445 control.

446 Species turnover in *biodiversity* and *combination* treatments led to a higher share of  
447 characteristic grassland species. Percentage of characteristic grassland species was highest in  
448 *biodiversity* and *combination* treatments (Fig. 8). As numerous other studies showed, without  
449 bridging dispersal limitation by actively introducing seeds, it is rather unlikely that species-rich  
450 grasslands will develop on former arable land (65; 66). This is due to the disappearance of  
451 characteristic grassland species in intensively used agricultural landscapes (67). This is  
452 especially problematic within modern agricultural landscapes in Northern Germany, which are  
453 characterized by severe habitat fragmentation and biodiversity losses in grasslands (68).

454 The percentage of characteristic grassland species in *biodiversity* treatments was approximately  
455 40%, which was 10 % higher than in treatments without seed addition. While the number of  
456 species in the *biodiversity* treatments decreased again, the number of species in the *combination*

457 2 treatment increased constantly over the study period and exceeded the number of species in  
458 the *biodiversity* treatments. This increase in species richness may have been supported by  
459 sowing different grassland species twice, which lowers the risk that establishment fails due to  
460 unfavorable germination conditions when plants are sown in one year only. Besides the positive  
461 effect of two sowing applications, the establishment of higher species numbers in the  
462 *combination 2* treatment might have been supported by the yearly cut, which is known to favor  
463 the occurrence of forbs over grasses (69). In the *control*, dominance of grasses and occurrence  
464 of ruderal species was higher than in all other treatments. This suggests that residual soil fertility  
465 on ex-arable land may reduce the survival of characteristic grassland species (70).

466 Most promising in promoting threatened plants is mowing and sowing (*biodiversity 1*), probably  
467 because germination conditions for seeds in mowed plots are better than in non-mowed plots. In  
468 the latter, the accumulation of living and dead biomass and the encroachment of competitor  
469 species can hinder germination and establishment (64, 71). However, there is also a noticeable  
470 effect of seed addition by hand – probably because trampling of cattle can result in relatively  
471 large bare patches, potentially increasing establishment opportunities for sown seeds (72).  
472 Various studies (73, 74) showed that gap size in the sward is an important element of successive  
473 seed introduction.

474

## 475 **Conclusion**

476

477 Slight *J. vulgaris* decline occurred under all treatments and consequently we found no  
478 significant differences in *J. vulgaris* abundance between the applied treatments and the control.  
479 Even the most effective treatment, the *flower cut* treatment, which was significant by trend and  
480 the only treatment resulting in a population growth rate below one during the complete study  
481 period, did not lead to a complete disappearance of *J. vulgaris* but allowed on average five

482 *J. vulgaris* plants per square meter to occur. Therefore, *J. vulgaris* management in nature  
483 conservation grasslands needs patience and will not eradicate the weed.

484 We probably did not find clear differences between the treatments as *J. vulgaris* is a  
485 successional plant adapted to disturbance and quickly reacts to windows of opportunity being  
486 continuously created by grazing animals or because of drought. Moreover, as our treatments  
487 were designed to minimize unwanted harmful impacts on grassland ecosystems, we refrained  
488 from drastic measures. Nonetheless, our results reveal some promising approaches for  
489 *J. vulgaris* regulation that do not jeopardize nature conservation efforts.

490 The *flower cut* treatment, which led to a constant decline in *J. vulgaris* resembles a traditional  
491 non-intensive meadow management technique, which supports high plant species and animal  
492 species richness. Still, the two cuts that were employed for this treatment may harm  
493 invertebrates. These drawbacks must be weighed against the treatment's regulating effect on  
494 *J. vulgaris*. This might restrict the application of this measure to sites with high conflict  
495 potential.

496

## 497 **Acknowledgements**

498 We gratefully acknowledge Diethart Matthies for his help with the bootstrap analyses and  
499 Mario Hasler for statistical advice. Furthermore, we thank Hollyn Hartlep for her valuable help  
500 in proofreading. The research in this thesis was funded by the Stiftung-Naturschutz Schleswig-  
501 Holstein.

502

## 503 **Literature Cited**

- 504 1. Harper JL, Wood WA. Biological Flora of the British Isles: *Senecio jacobaea*. Journal of Ecology  
505 1957; 45(2):617–37.
- 506 2. Wardle DA. The ecology of ragwort (*Senecio jacobaea* L.): A review. New Zealand Journal of  
507 Ecology 1987 [cited 2016 Feb 25]; 10:67–76.



- 508 3. Leiss KA. Management practices for control of ragwort species. *Phytochemistry Reviews* 2011;  
509 10(1):153–63.
- 510 4. Augustin B, Oehme S, Mattern G, Roth W. Maßnahmen gegen Jakobskreuzkraut *Senecio jacobaea* -  
511 langfristige Aspekte auf Wirksamkeit und biologische Vielfalt. In: 28. Deutsche Arbeitsbesprechung  
512 über Fragen der Unkrautbiologie und -bekämpfung, 27.02. – 01.03.2018 in Braunschweig. p. 47–53  
513 [cited 2021 Feb 15].
- 514 5. Huckauf A, Rabe I, Aboling S, Böhling J, Böttner E, Ehlers B et al. Umgang mit dem Jakobs-  
515 Kreuzkraut: Meiden - dulden - bekämpfen. 4., überarbeitete Auflage, August 2017. Flintbek, Molfsee:  
516 Landesamt für Landwirtschaft Umwelt und ländliche Räume des Landes Schleswig-Holstein (LLUR);  
517 Stiftung Naturschutz Schleswig-Holstein; 2017. (Schriftenreihe LLUR SH Natur; vol 25) [cited 2020 Nov  
518 3].
- 519 6. McEvoy PB, Cox C, Coombs E. Successful biological control of ragwort, *Senecio jacobaea*, by  
520 introduced insects in Oregon. *Ecological Applications* 1991; 1(4):430–42.
- 521 7. Suter M, Lüscher A. Measures for the control of *Senecio aquaticus* in managed grassland. *Weed*  
522 *Research* 2011 [cited 2016 Apr 27]; 51(6):601–11.
- 523 8. Jacobs J, Sing S. Ecology and management of tansy ragwort (*Senecio jacobaea* L.). Montana:  
524 Natural Resources Conservation Service; 2009.
- 525 9. Suter M, Siegrist-Maag S, Connolly J, Lüscher A. Can the occurrence of *Senecio jacobaea* be  
526 influenced by management practice? *Weed Research* 2007 [cited 2016 May 31]; 47(47):262–9.
- 527 10. James RR, McEvoy PB, Cox CS. Combining the cinnabar moth (*Tyria jacobaeae*) and the ragwort  
528 flea beetle (*Longitarsus jacobaeae*) for control of ragwort (*Senecio jacobaea*): An experimental  
529 analysis. *Journal of Applied Ecology* 1992 [cited 2020 Aug 21]; 29(3):589–96.
- 530 11. Schmitz J, Hahn M, Brühl CA. Agrochemicals in field margins – An experimental field study to  
531 assess the impacts of pesticides and fertilizers on a natural plant community. *Agriculture, Ecosystems*  
532 *& Environment* 2014 [cited 2020 Oct 5]; 193:60–9.
- 533 12. Roberts PD, Pullin AS. The effectiveness of management interventions used to control ragwort  
534 species. *Environ Manage* 2007; 39(5):691–706.
- 535 13. Siegrist-Maag S, Lüscher A, Suter M. Reaktion von Jakobs-Kreuzkraut auf Schnitt. *Agrarforschung*  
536 (Switzerland) 2008; 15(7):338–43.
- 537 14. van der Meijden E, van der Waals-Kooi RE. The population ecology of *Senecio jacobaea* in a sand  
538 dune system: I. Reproductive strategy and the biennial habit. *Journal of Ecology* 1979; 67(1):131–53.
- 539 15. McLaren D, Faithfull I. Landcare notes: Ragwort - Management: Departement of sustainability  
540 and environment; 2004 LC0382 [cited 2016 Oct 24]. Available from: URL:  
541 [http://www.sgl.n.net.au/wp-content/uploads/2017/03/Ragwort\\_Management.pdf](http://www.sgl.n.net.au/wp-content/uploads/2017/03/Ragwort_Management.pdf).
- 542 16. Carvalho S, Macel M, Mulder PPJ, Skidmore A, van der Putten WH. Chemical variation in *Jacobaea*  
543 *vulgaris* is influenced by the interaction of season and vegetation successional stage. *Phytochemistry*  
544 2014 [cited 2016 Apr 11]; 99:86–94.
- 545 17. Jung LS, Eckstein RL, Otte A, Donath TW. Above- and below-ground nutrient and alkaloid  
546 dynamics in *Colchicum autumnale*: Optimal mowing dates for population control or low hay toxicity.  
547 *Weed Research* 2012; 52(4):348–57. Available from: URL:  
548 [https://onlinelibrary.wiley.com/doi/pdf/10.1111/j.1365-](https://onlinelibrary.wiley.com/doi/pdf/10.1111/j.1365-3180.2012.00923.x?casa_token=LVTkIkP_FQ8AAAAA:sl8eC4052xWa6Am-TIKJTxYQZR9JIKXmrTLQt1b8iXDitQUnry81rHmEUF3I1h3bFy3gP9G53uATdw8)  
549 [3180.2012.00923.x?casa\\_token=LVTkIkP\\_FQ8AAAAA:sl8eC4052xWa6Am-](https://onlinelibrary.wiley.com/doi/pdf/10.1111/j.1365-3180.2012.00923.x?casa_token=LVTkIkP_FQ8AAAAA:sl8eC4052xWa6Am-TIKJTxYQZR9JIKXmrTLQt1b8iXDitQUnry81rHmEUF3I1h3bFy3gP9G53uATdw8)  
550 [TIKJTxYQZR9JIKXmrTLQt1b8iXDitQUnry81rHmEUF3I1h3bFy3gP9G53uATdw8](https://onlinelibrary.wiley.com/doi/pdf/10.1111/j.1365-3180.2012.00923.x?casa_token=LVTkIkP_FQ8AAAAA:sl8eC4052xWa6Am-TIKJTxYQZR9JIKXmrTLQt1b8iXDitQUnry81rHmEUF3I1h3bFy3gP9G53uATdw8).



- 551 18. Cameron E. A study of the natural control of ragwort (*Senecio jacobaea* L.). *Journal of Ecology*  
552 1935; 23(2):265–322.
- 553 19. DiTomaso JM. Invasive weeds in rangelands: Species, impacts, and management. *Weed Science*  
554 2000; 48(2):255–65.
- 555 20. Levine JM, Adler PB, Yelenik SG. A meta-analysis of biotic resistance to exotic plant invasions.  
556 *Ecology Letters* 2004; 7(10):975–89. Available from: URL:  
557 <https://onlinelibrary.wiley.com/doi/pdf/10.1111/j.1461-0248.2004.00657.x>.
- 558 21. Funk JL, Cleland EE, Suding KN, Zavaleta ES. Restoration through reassembly: Plant traits and  
559 invasion resistance. *Trends in Ecology & Evolution* 2008; 23(12):695–703. Available from: URL:  
560 <http://www.sciencedirect.com/science/article/pii/S0169534708003017>.
- 561 22. Baasch A, Kirmer A, Tischew S. Nine years of vegetation development in a postmining site: Effects  
562 of spontaneous and assisted site recovery. *Journal of Applied Ecology* 2012 [cited 2020 Aug 20];  
563 49(1):251–60.
- 564 23. Oakley CA, Knox JS, Symstad A. Plant species richness increases resistance to invasion by non-  
565 resident plant species during grassland restoration. *Appl Veg Sci* 2013 [cited 2020 Oct 7]; 16(1):21–8.
- 566 24. Peeters A. Past and future of European grasslands.: The challenge of the CAP towards 2020. In:  
567 Goliński P, Warda M, Stypiński P, editors. *Grassland - a European Resource?: Proceedings of the 24th*  
568 *General Meeting of the European Grassland Federation, Lublin, Poland, 03 - 07 June 2012*. Poznań:  
569 Garmond Oficyna Wydawnicza; 2012. p. 17–32 (Grassland science in Europe; vol. 17).
- 570 25. Kiehl K, Kirmer A, Shaw NL, Tischew S, editors. *Guidelines for native seed production and*  
571 *grassland restoration*. Newcastle upon Tyne: Cambridge Scholars Publishing; 2014. Available from:  
572 URL:  
573 <http://search.ebscohost.com/login.aspx?direct=true&scope=site&db=nlebk&db=nlabk&AN=801117>.
- 574 26. Kiehl K, Kirmer A, Donath TW, Rasran L, Hölzel N. Species introduction in restoration projects:  
575 Evaluation of different techniques for the establishment of semi-natural grasslands in Central and  
576 Northwestern Europe. *Basic and Applied Ecology* 2010 [cited 2016 Sep 21]; 11(4):285–99.
- 577 27. Donath TW, Hölzel N, Otte A. Influence of competition by sown grass, disturbance and litter on  
578 recruitment of rare flood-meadow species. *Biological Conservation* 2006 [cited 2020 Aug 24];  
579 130(3):315–23.
- 580 28. Foster BL, Murphy CA, Keller KR, Aschenbach TA, Questad EJ, Kindscher K. Restoration of prairie  
581 community structure and ecosystem function in an abandoned hayfield: A sowing experiment.  
582 *Restoration Ecology* 2007; 15(4):652–61. Available from: URL:  
583 <https://onlinelibrary.wiley.com/doi/pdf/10.1111/j.1526-100X.2007.00277.x>.
- 584 29. Bezemer TM, van der Putten WH, Rienks F. Niets doen loont bij Jakobskruidplaag. *De*  
585 *Levende Natuur* 2006 [cited 2020 Jun 5]; 107(5):214–6.
- 586 30. van de Voorde TFJ, Ruijten M, van der Putten WH, Bezemer TM. Can the negative plant–soil  
587 feedback of *Jacobaea vulgaris* be explained by autotoxicity? *Basic and Applied Ecology* 2012 [cited  
588 2020 Apr 28]; 13(6):533–41.
- 589 31. Oberdorfer E. *Pflanzensoziologische Exkursionsflora*. 6th ed. Stuttgart: E. Ulmer; 1990.
- 590 32. Crawley M, Nachapong M. The establishment of seedlings from primary and regrowth seeds of  
591 ragwort (*Senecio jacobaea*). *Journal of Ecology* 1985; 73(1):255–61.

- 592 33. Eisele N, Tonn B., Pekrun C., Elsaesser M. Influence of different cutting dates on regrowth and  
593 achene germination capacity of *Senecio jacobaea*. In: Pötsch, E. M., Krautzer, B. & Hopkins, A.  
594 (Eds.): Grassland Science in Europe; 2011. p. 196–8 [cited 2017 Jan 3].
- 595 34. Heydemann B. Neuer biologischer Atlas: Ökologie für Schleswig-Holstein und Hamburg.  
596 Neumünster: Wachholtz Verlag; 1997.
- 597 35. Ssymank A, Ellwanger G, Raths U. Beweidung als Management in NATURA-2000 Gebieten. In:  
598 Heinz Sielmann Stiftung D, editor. Naturnahe Beweidung und NATURA 2000: Ganzjahresbeweidung  
599 im Management von Lebensraumtypen und Arten im europäischen Schutzgebietssystem NATURA  
600 2000. 1st ed. Duderstadt, Germany; 2015.
- 601 36. Braun-Blanquet J. Plant Sociology: The Study of Plant Communities. New York: McGraw-Hill;  
602 1932.
- 603 37. Mierwald U. Die Farn- und Blütenpflanzen Schleswig-Holsteins. Rote Liste. 4. Fassung, Datenstand  
604 Dez. 2005. Flintbek; 2006. (LANU SH - Natur / RL; vol 18,1).
- 605 38. Schmidt, Jürgen, Petersen W. Kartieranleitung und Biotoptypenschlüssel für die Biotopkartierung  
606 Schleswig-Holstein: mit Hinweisen zu den gesetzlich geschützten Biotopen sowie den  
607 Lebensraumtypen gemäß Anhang I der FFH-Richtlinie. 5th ed. Flintbek; 2019 [cited 2020 Jun 5].
- 608 39. Caswell H. Matrix Population Models: Construction, Analysis, and Interpretation. Second Edition.  
609 Massachusetts: Inc. Publishers; 2001.
- 610 40. Jung LS, Winter S, Kriechbaum M, Eckstein RL, Donath TW, Otte A. Regulation of meadow saffron  
611 (*Colchicum autumnale* L.) in extensively managed grasslands. Grassland Science in Europe 2010 [cited  
612 2018 Mar 15]; (15):660–2.
- 613 41. R: A language and environment for statistical computing. Vienna, Austria: R Foundation for  
614 Statistical Computing; 2019. Available from: URL: <https://www.R-project.org/>.
- 615 42. Franco M, Silvertown J. A comparative demography of plants based upon elasticities of vital rates.  
616 Ecology 2004; 85(2):531–8. Available from: URL:  
617 [https://esajournals.onlinelibrary.wiley.com/doi/full/10.1890/02-](https://esajournals.onlinelibrary.wiley.com/doi/full/10.1890/02-0651?casa_token=L8i0BfoRxXIAAAAA:okrEVxdn-4fNYD_D4s9YEJQjvp7WtJay_SgCuUe0chdxY6aNmAneyKIYKJSsHw4xSiUbyuxmSi_S7j8)  
618 [0651?casa\\_token=L8i0BfoRxXIAAAAA:okrEVxdn-](https://esajournals.onlinelibrary.wiley.com/doi/full/10.1890/02-0651?casa_token=L8i0BfoRxXIAAAAA:okrEVxdn-4fNYD_D4s9YEJQjvp7WtJay_SgCuUe0chdxY6aNmAneyKIYKJSsHw4xSiUbyuxmSi_S7j8)  
619 [4fNYD\\_D4s9YEJQjvp7WtJay\\_SgCuUe0chdxY6aNmAneyKIYKJSsHw4xSiUbyuxmSi\\_S7j8](https://esajournals.onlinelibrary.wiley.com/doi/full/10.1890/02-0651?casa_token=L8i0BfoRxXIAAAAA:okrEVxdn-4fNYD_D4s9YEJQjvp7WtJay_SgCuUe0chdxY6aNmAneyKIYKJSsHw4xSiUbyuxmSi_S7j8).
- 620 43. POPTOOLS. Canberra; 2011. Available from: URL: <http://www.poptools.org>.
- 621 44. Laird NM, Ware JH. Random-effects models for longitudinal data. Biometrics 1982; 38(4):963–74.
- 622 45. Verbeke G, Molenberghs G. Linear mixed models for longitudinal data: Springer; 2000.
- 623 46. Nakagawa S, Schielzeth H. A general and simple method for obtaining R<sup>2</sup> from generalized linear  
624 mixed-effects models. Methods in Ecology and Evolution 2013; 4(2):133–42. Available from: URL:  
625 [https://besjournals.onlinelibrary.wiley.com/doi/pdf/10.1111/j.2041-](https://besjournals.onlinelibrary.wiley.com/doi/pdf/10.1111/j.2041-210x.2012.00261.x%4010.1111/%28ISSN%292041-210X.TOPMETHODS)  
626 [210x.2012.00261.x%4010.1111/%28ISSN%292041-210X.TOPMETHODS](https://besjournals.onlinelibrary.wiley.com/doi/pdf/10.1111/j.2041-210x.2012.00261.x%4010.1111/%28ISSN%292041-210X.TOPMETHODS).
- 627 47. Bretz F, Hothorn T, Westfall P. Multiple comparisons using R. London: Chapman and Hall/CRC;  
628 2011.
- 629 48. McCune B, Grace JB, Urban DL. Analysis of Ecological Communities. Glendon Beach: MjM  
630 Software Design; 2002.
- 631 49. Mühlenberg M. Freilandökologie. Heidelberg: Quelle & Meyer; 1989.

- 632 50. Bezemer TM, Harvey JA, Kowalchuk GA, Kopershoek H, van der Putten WH. Interplay between  
633 *Senecio jacobaea* and plant, soil, and aboveground insect community composition. *Ecology* 2006;  
634 87(8):2002–13.
- 635 51. Lawson CS, Ford MA, Mitchley J. The influence of seed addition and cutting regime on the success  
636 of grassland restoration on former arable land. *Applied Vegetation Science* 2004; 7(2):259–66.
- 637 52. van de Voorde TFJ, van der Putten WH, Martijn Bezemer T. Intra- and interspecific plant-soil  
638 interactions, soil legacies and priority effects during old-field succession. *Journal of Ecology* 2011;  
639 99(4):945–53.
- 640 53. Kulmatiski A, Beard KH, Stark JM. Soil history as a primary control on plant invasion in abandoned  
641 agricultural fields. *Journal of Applied Ecology* 2006 [cited 2020 Oct 7]; 43(5):868–76.
- 642 54. Crawley MJ, Gillman MP. Population dynamics of cinnabar moth and ragwort in grassland. *Journal*  
643 *of Animal Ecology* 1989 [cited 2020 Jul 3]; 58(3):1035–50.
- 644 55. Winter S, Jung LS, Eckstein RL, Otte A, Donath TW, Kriechbaum M et al. Control of the toxic plant  
645 *Colchicum autumnale* in semi-natural grasslands: Effects of cutting treatments on demography and  
646 diversity. *J Appl Ecol* 2014 [cited 2020 Jun 9]; 51(2):524–33.
- 647 56. Otzen D. Life forms of three *Senecio* species in relation to accumulation and utilization of  
648 nonstructural carbohydrates. *Acta Bot. Neerl.* 1977 [cited 2020 Aug 21]; 26(5):401–9.
- 649 57. Hüls J, Otte A, Eckstein RL. Population life-cycle and stand structure in dense and open stands of  
650 the introduced tall herb *Heracleum mantegazzianum*. *Biol Invasions* 2007 [cited 2020 Jul 14];  
651 9(7):799–811.
- 652 58. Lennartsson T, Oostermeijer JGB. Demographic variation and population viability in *Gentianella*  
653 *campestris*: Effects of grassland management and environmental stochasticity. *Journal of Ecology*  
654 2001 [cited 2020 Jul 14]; 89(3):451–63.
- 655 59. Eichberg C, Donath TW. Sheep trampling on surface-lying seeds improves seedling recruitment in  
656 open sand ecosystems. *Restoration Ecology* 2017; 26:S211–S219. Available from: URL:  
657 <https://onlinelibrary.wiley.com/doi/full/10.1111/rec.12650>.
- 658 60. Dauer JT, McEvoy PB, van Sickle J. Controlling a plant invader by targeted disruption of its life  
659 cycle. *Journal of Applied Ecology* 2012; 49(2):322–30.
- 660 61. Smith AL, Barrett RL, Milner RNC. Annual mowing maintains plant diversity in threatened  
661 temperate grasslands. *Applied Vegetation Science* 2018; 21(2):207–18.
- 662 62. Jongepierová I, Mitchley J, Tzanopoulos J. A field experiment to recreate species rich hay  
663 meadows using regional seed mixtures. *Biological Conservation* 2007 [cited 2020 Jun 29]; 139(3-  
664 4):297–305.
- 665 63. Fritch RA, Sheridan H, Finn JA, Kirwan L, hUallacháin DÓ. Methods of enhancing botanical  
666 diversity within field margins of intensively managed grassland: A 7-year field experiment. *Journal of*  
667 *Applied Ecology* 2011 [cited 2020 Jun 29]; 48(3):551–60.
- 668 64. Schmiede R, Otte A, Donath TW. Enhancing plant biodiversity in species-poor grassland through  
669 plant material transfer – the impact of sward disturbance. *Applied Vegetation Science* 2012;  
670 15(2):290–8. Available from: URL: [https://onlinelibrary.wiley.com/doi/full/10.1111/j.1654-  
671 109X.2011.01168.x](https://onlinelibrary.wiley.com/doi/full/10.1111/j.1654-109X.2011.01168.x).
- 672 65. Pywell RF, Bullock JM, Hopkins A, Walker KJ, Sparks TH, Burke MJW et al. Restoration of  
673 species-rich grassland on arable land: Assessing the limiting processes using a multi-site experiment.

- 674 Journal of Applied Ecology 2002; 39(2):294–309. Available from: URL:  
675 <https://besjournals.onlinelibrary.wiley.com/doi/pdf/10.1046/j.1365-2664.2002.00718.x>.
- 676 66. Hölzel N, Otte A. Restoration of a species-rich flood meadow by topsoil removal and diaspore  
677 transfer with plant material. *Applied Vegetation Science* 2003; 6(2):131–40. Available from: URL:  
678 <https://onlinelibrary.wiley.com/doi/pdf/10.1111/j.1654-109X.2003.tb00573.x>.
- 679 67. Leuschner C, Wesche K, Meyer S, Krause B, Steffen K, Becker T et al. Veränderungen und  
680 Verarmung in der Offenlandvegetation Norddeutschlands seit den 1950er Jahren:  
681 Wiederholungsaufnahmen in Äckern, Grünland und Fließgewässern. *Berichte der Rheinhold-Tüxen-*  
682 *Gesellschaft* 2013 [cited 2016 Feb 26]; 25:166–82.
- 683 68. Kollmann J, Kirmer A, Tischew S, Hölzel N, Kiehl K. *Renaturierungsökologie*. Berlin: Springer  
684 *Spektrum*; 2019 [cited 2020 Jul 14].
- 685 69. Briemle G. Empfehlungen zu Erhalt und Management von Extensiv- und Biotopgrünland. *landinfo*  
686 2007 [cited 2020 Jul 1]; 2:16–22.
- 687 70. Marrs RH. Soil Fertility and Nature Conservation in Europe: Theoretical Considerations and  
688 Practical Management Solutions. In: Begon M, Fitter AH, editors. *Advances in Ecological Research*:  
689 Academic Press; 1993. p. 241–300.
- 690 71. Valkó O, Deák B, Török P, Kirmer A, Tischew S, Kelemen A et al. High-diversity sowing in  
691 establishment gaps: a promising new tool for enhancing grassland biodiversity. *Tuexenia* 2016 [cited  
692 2020 Jul 8]; 36:359–78.
- 693 72. Faust C, Eichberg C, Storm C, Schwabe A. Post-dispersal impact on seed fate by livestock  
694 trampling – A gap of knowledge. *Basic and Applied Ecology* 2011; 12(3):215–26. Available from: URL:  
695 <http://www.sciencedirect.com/science/article/pii/S1439179111000247>.
- 696 73. Janicka M, Pawluśkiewicz B. The increasing in the floristic diversity of the abandoned  
697 Arrhenatherion elatioris meadows by dicotyledonous species oversowing. *J. Ecol. Eng.* 2020 [cited  
698 2020 Jun 29]; 21(1):168–79.
- 699 74. Eckstein RL, Ruch D, Otte A, Donath TW. Invasibility of a nutrient-poor pasture through resident  
700 and non-resident herbs is controlled by litter, gap size and propagule pressure. *PLoS ONE* 2012 [cited  
701 2020 Sep 9]; 7(7):e41887.
- 702
- 703

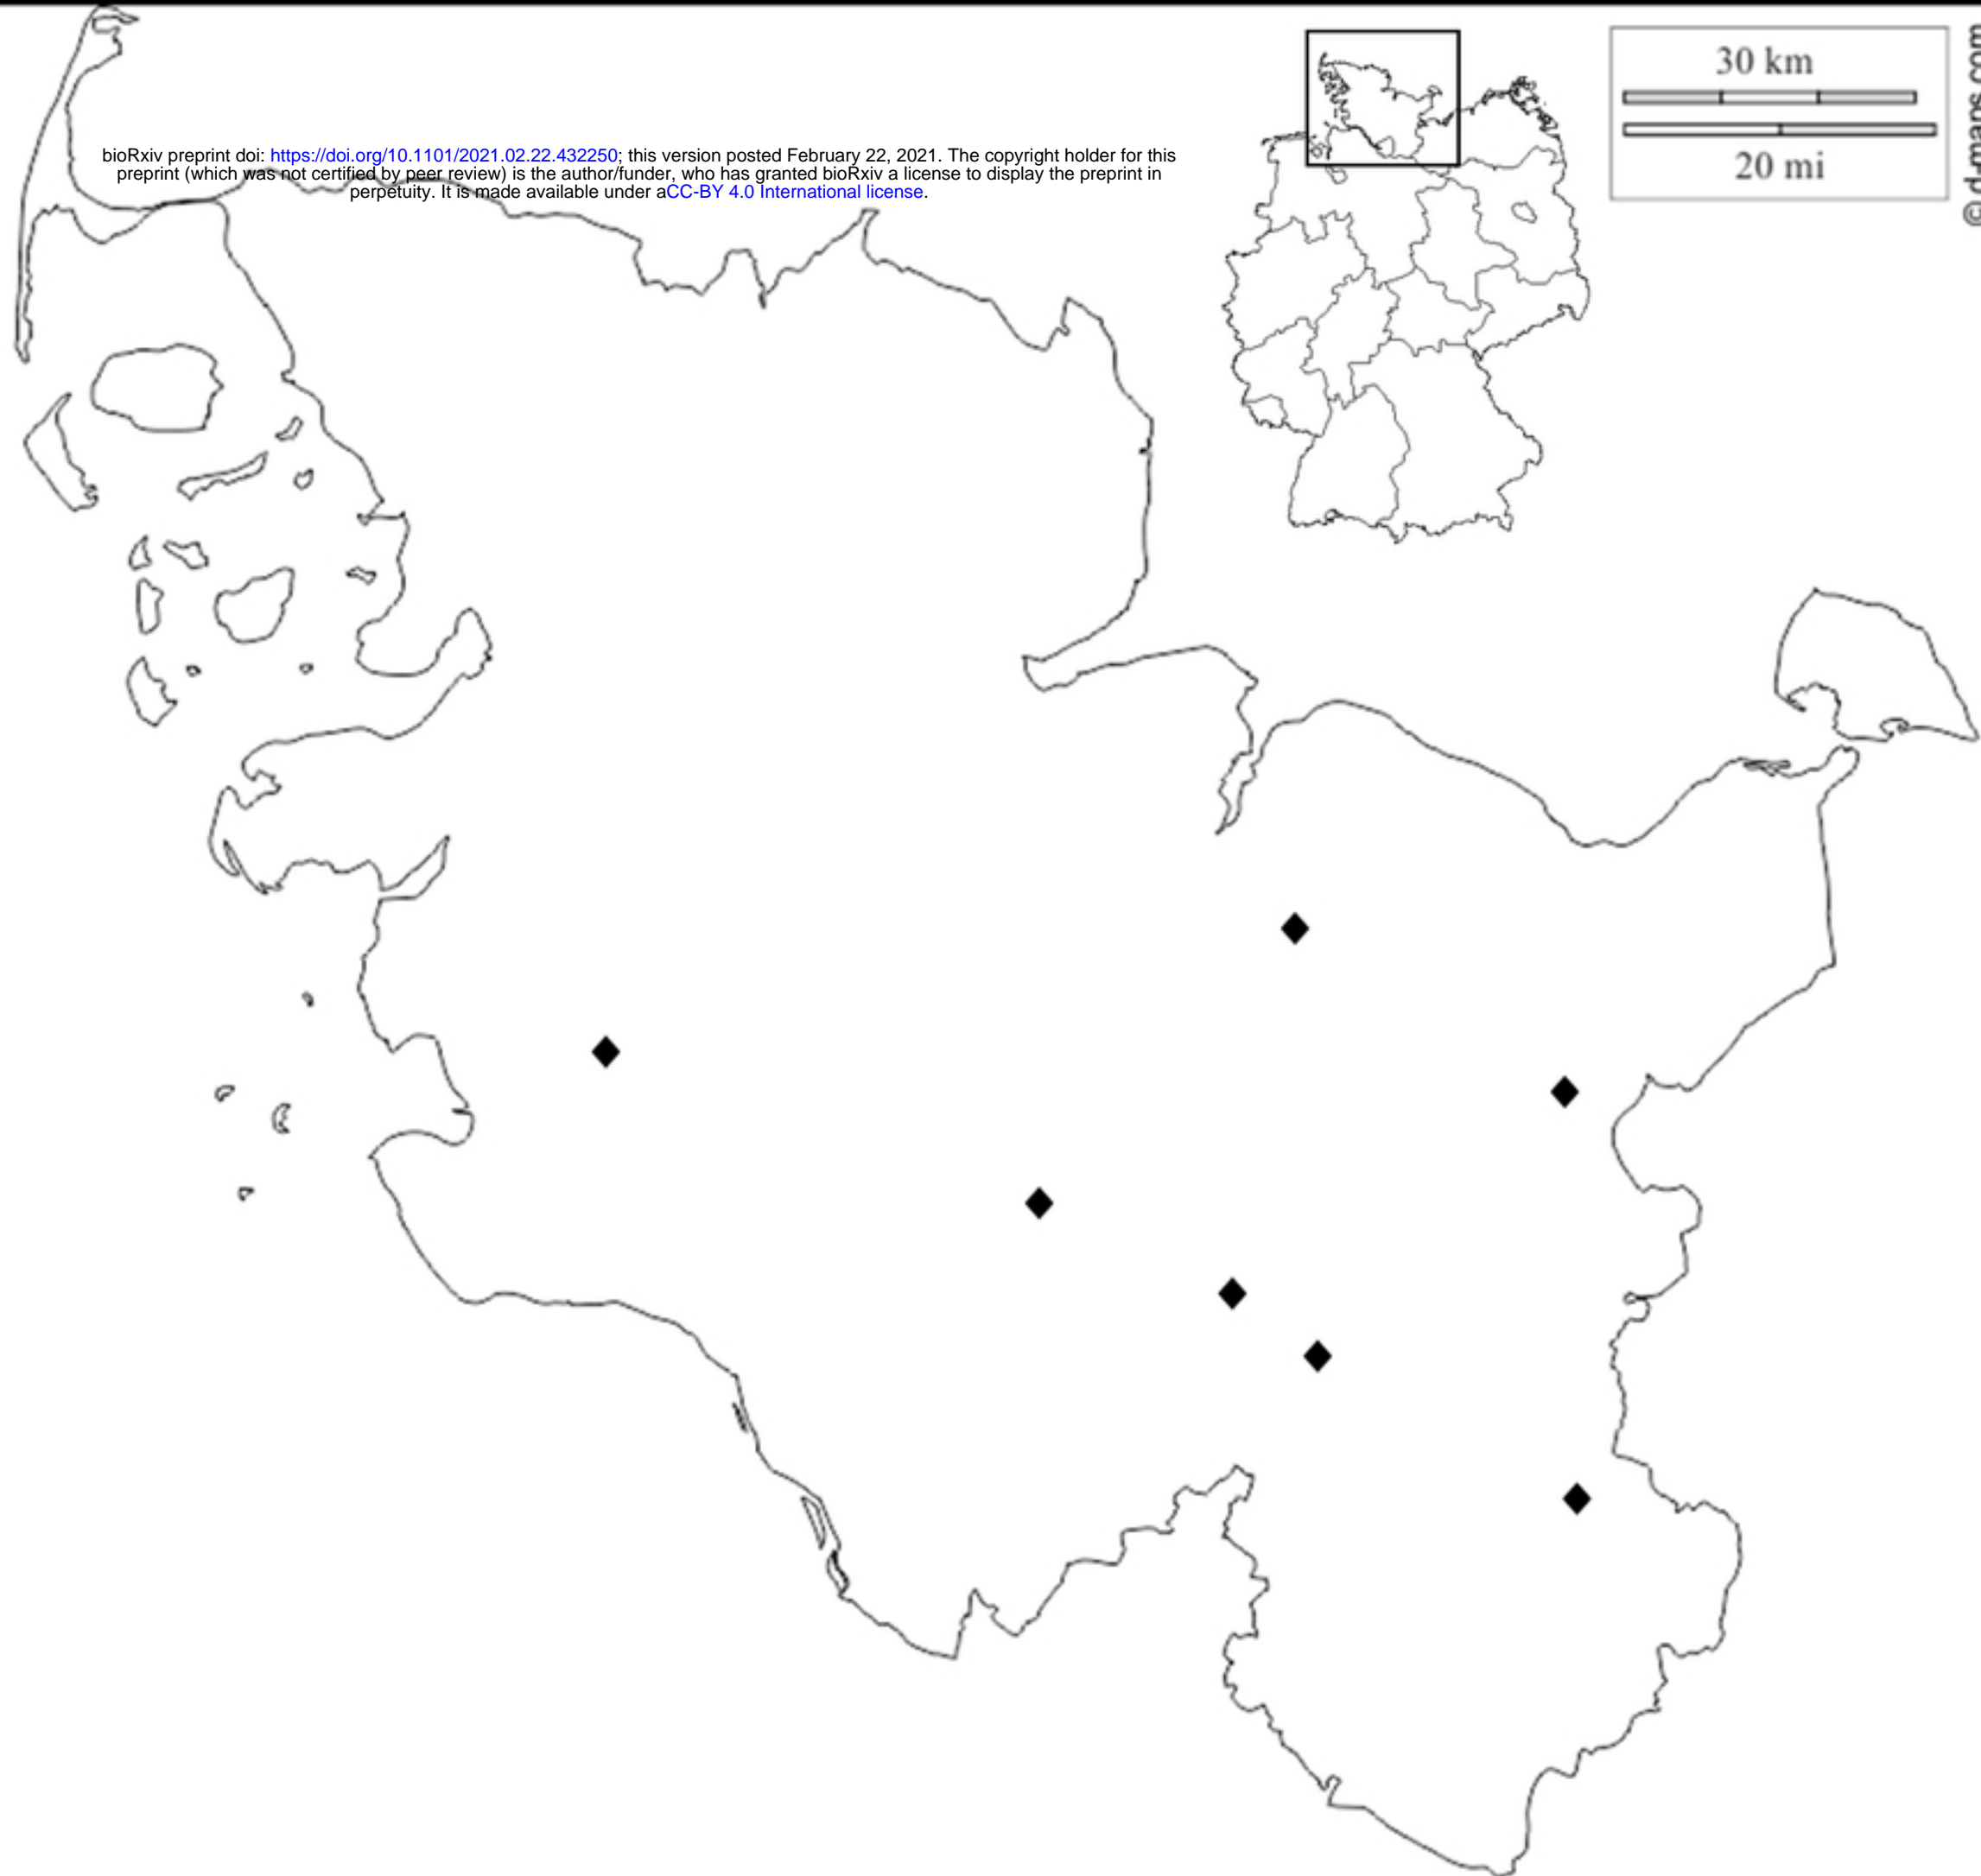

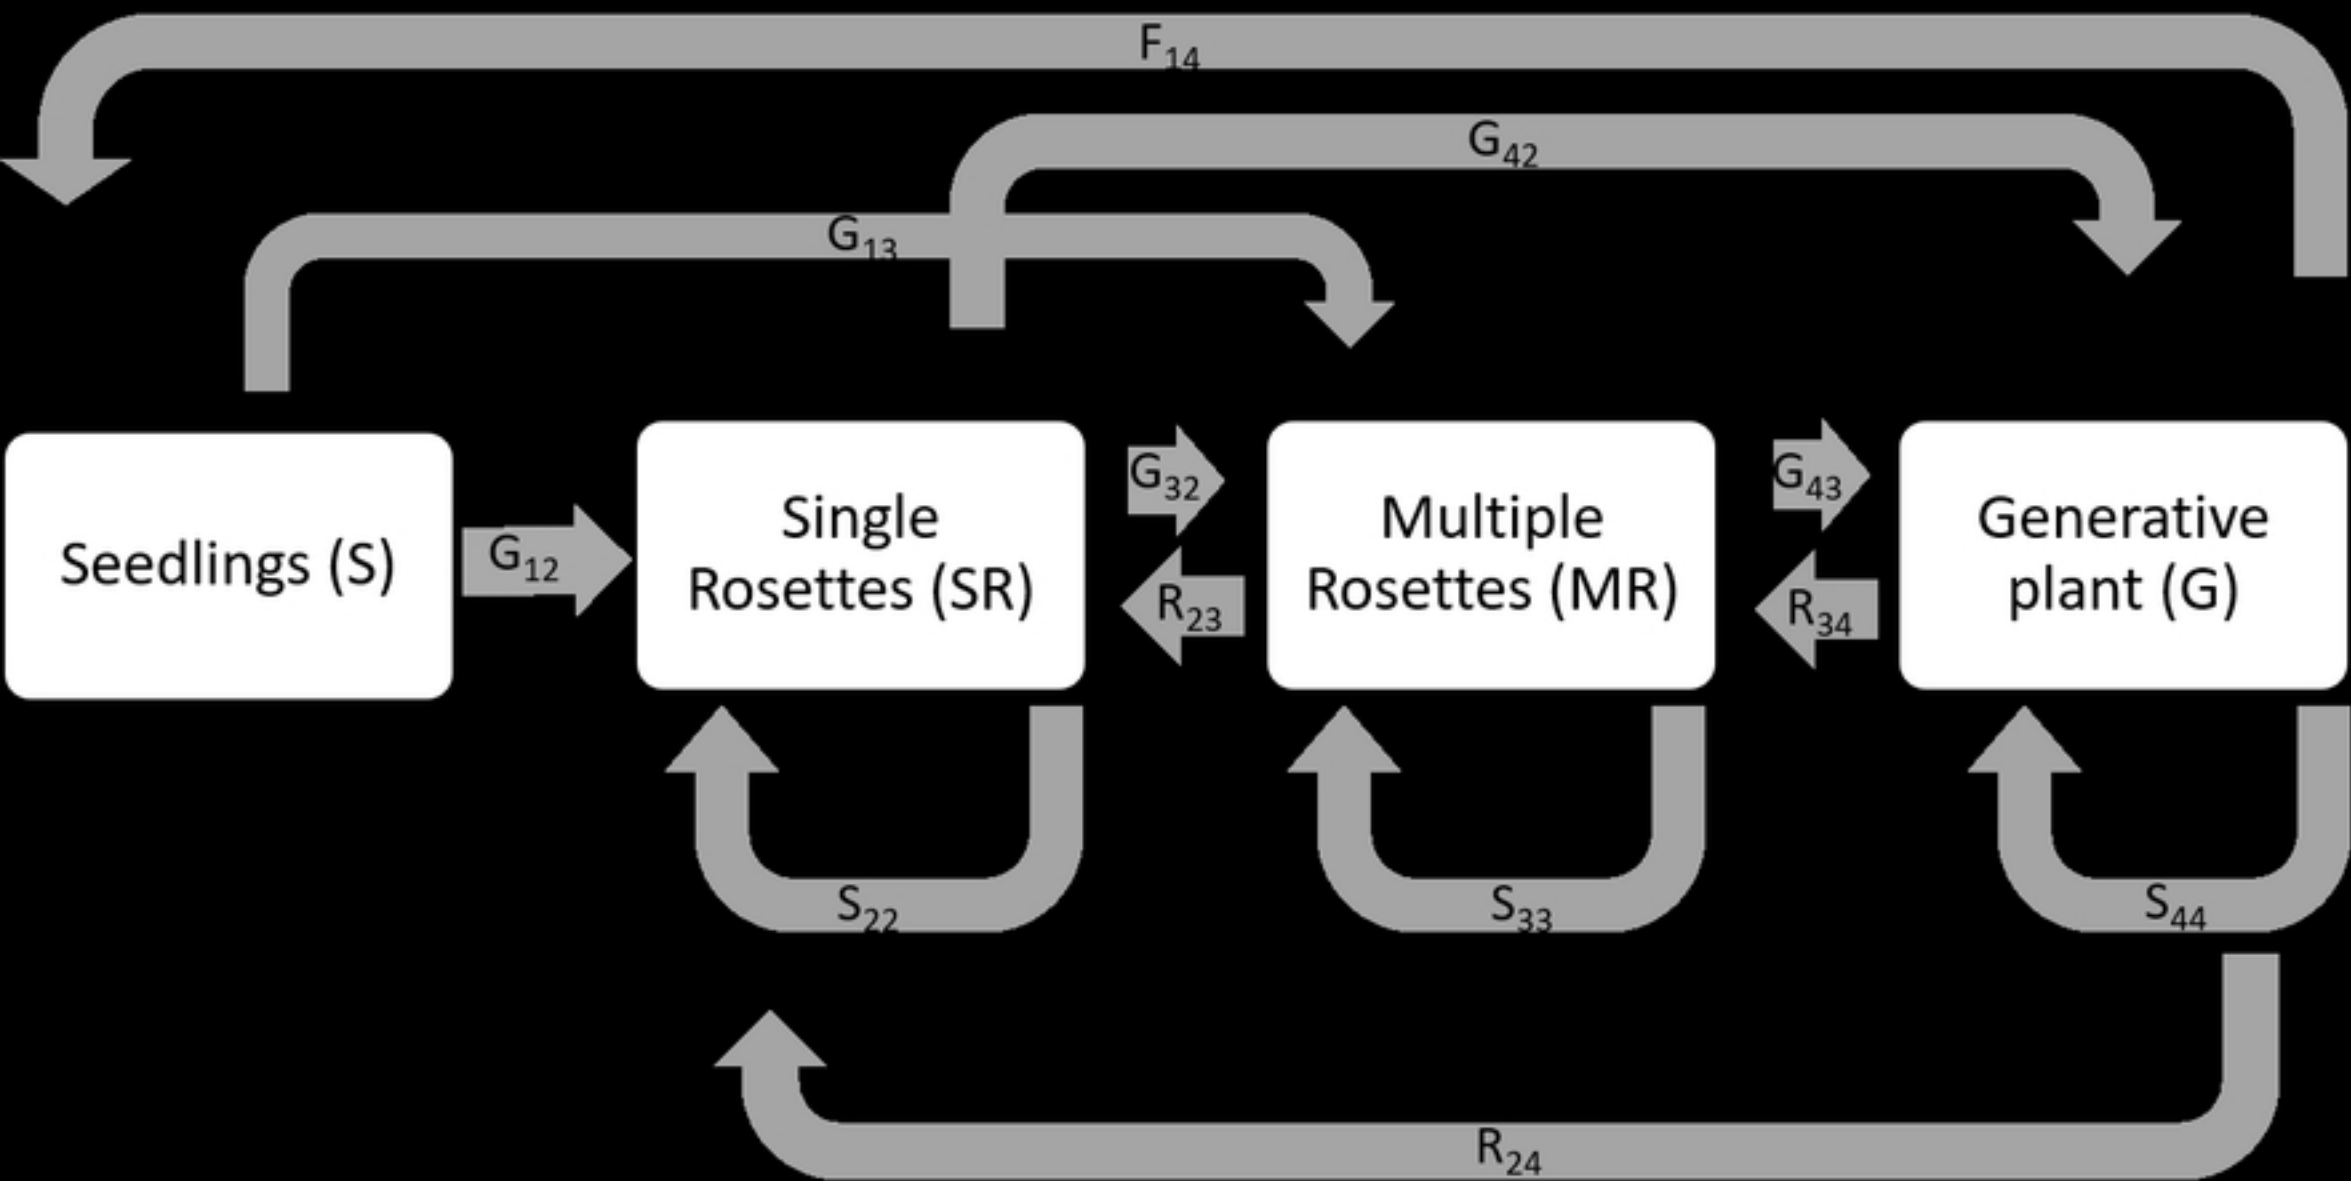

Figure

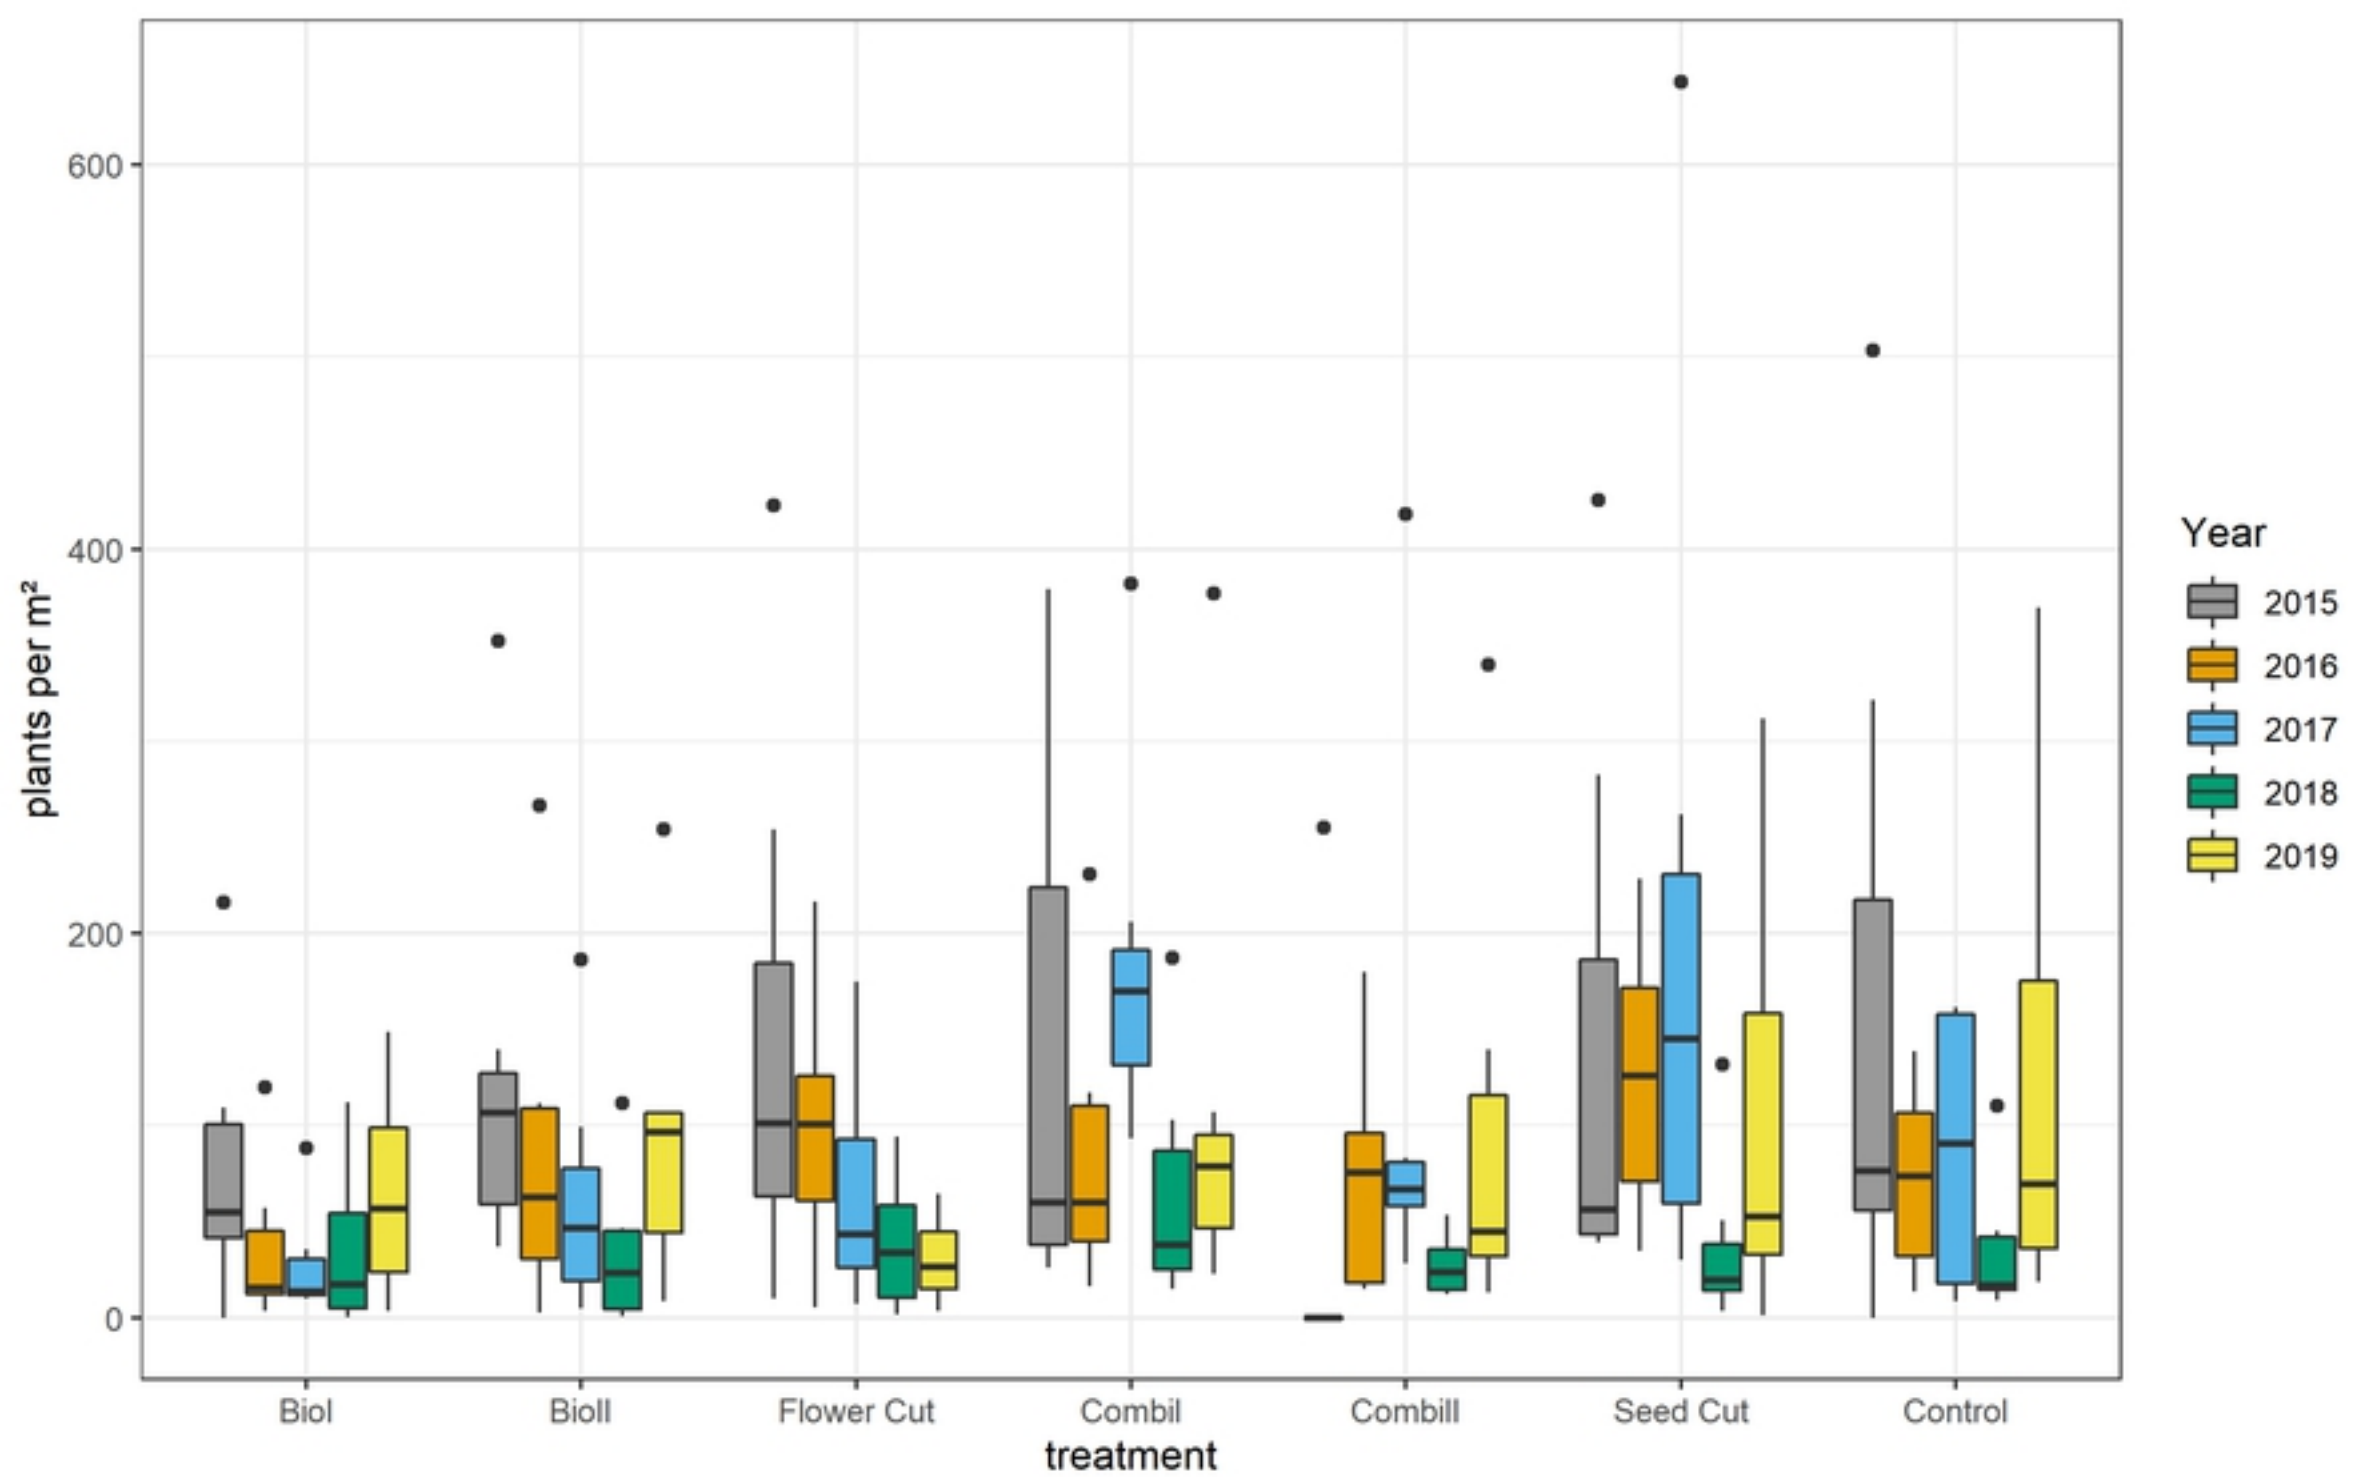

Figure



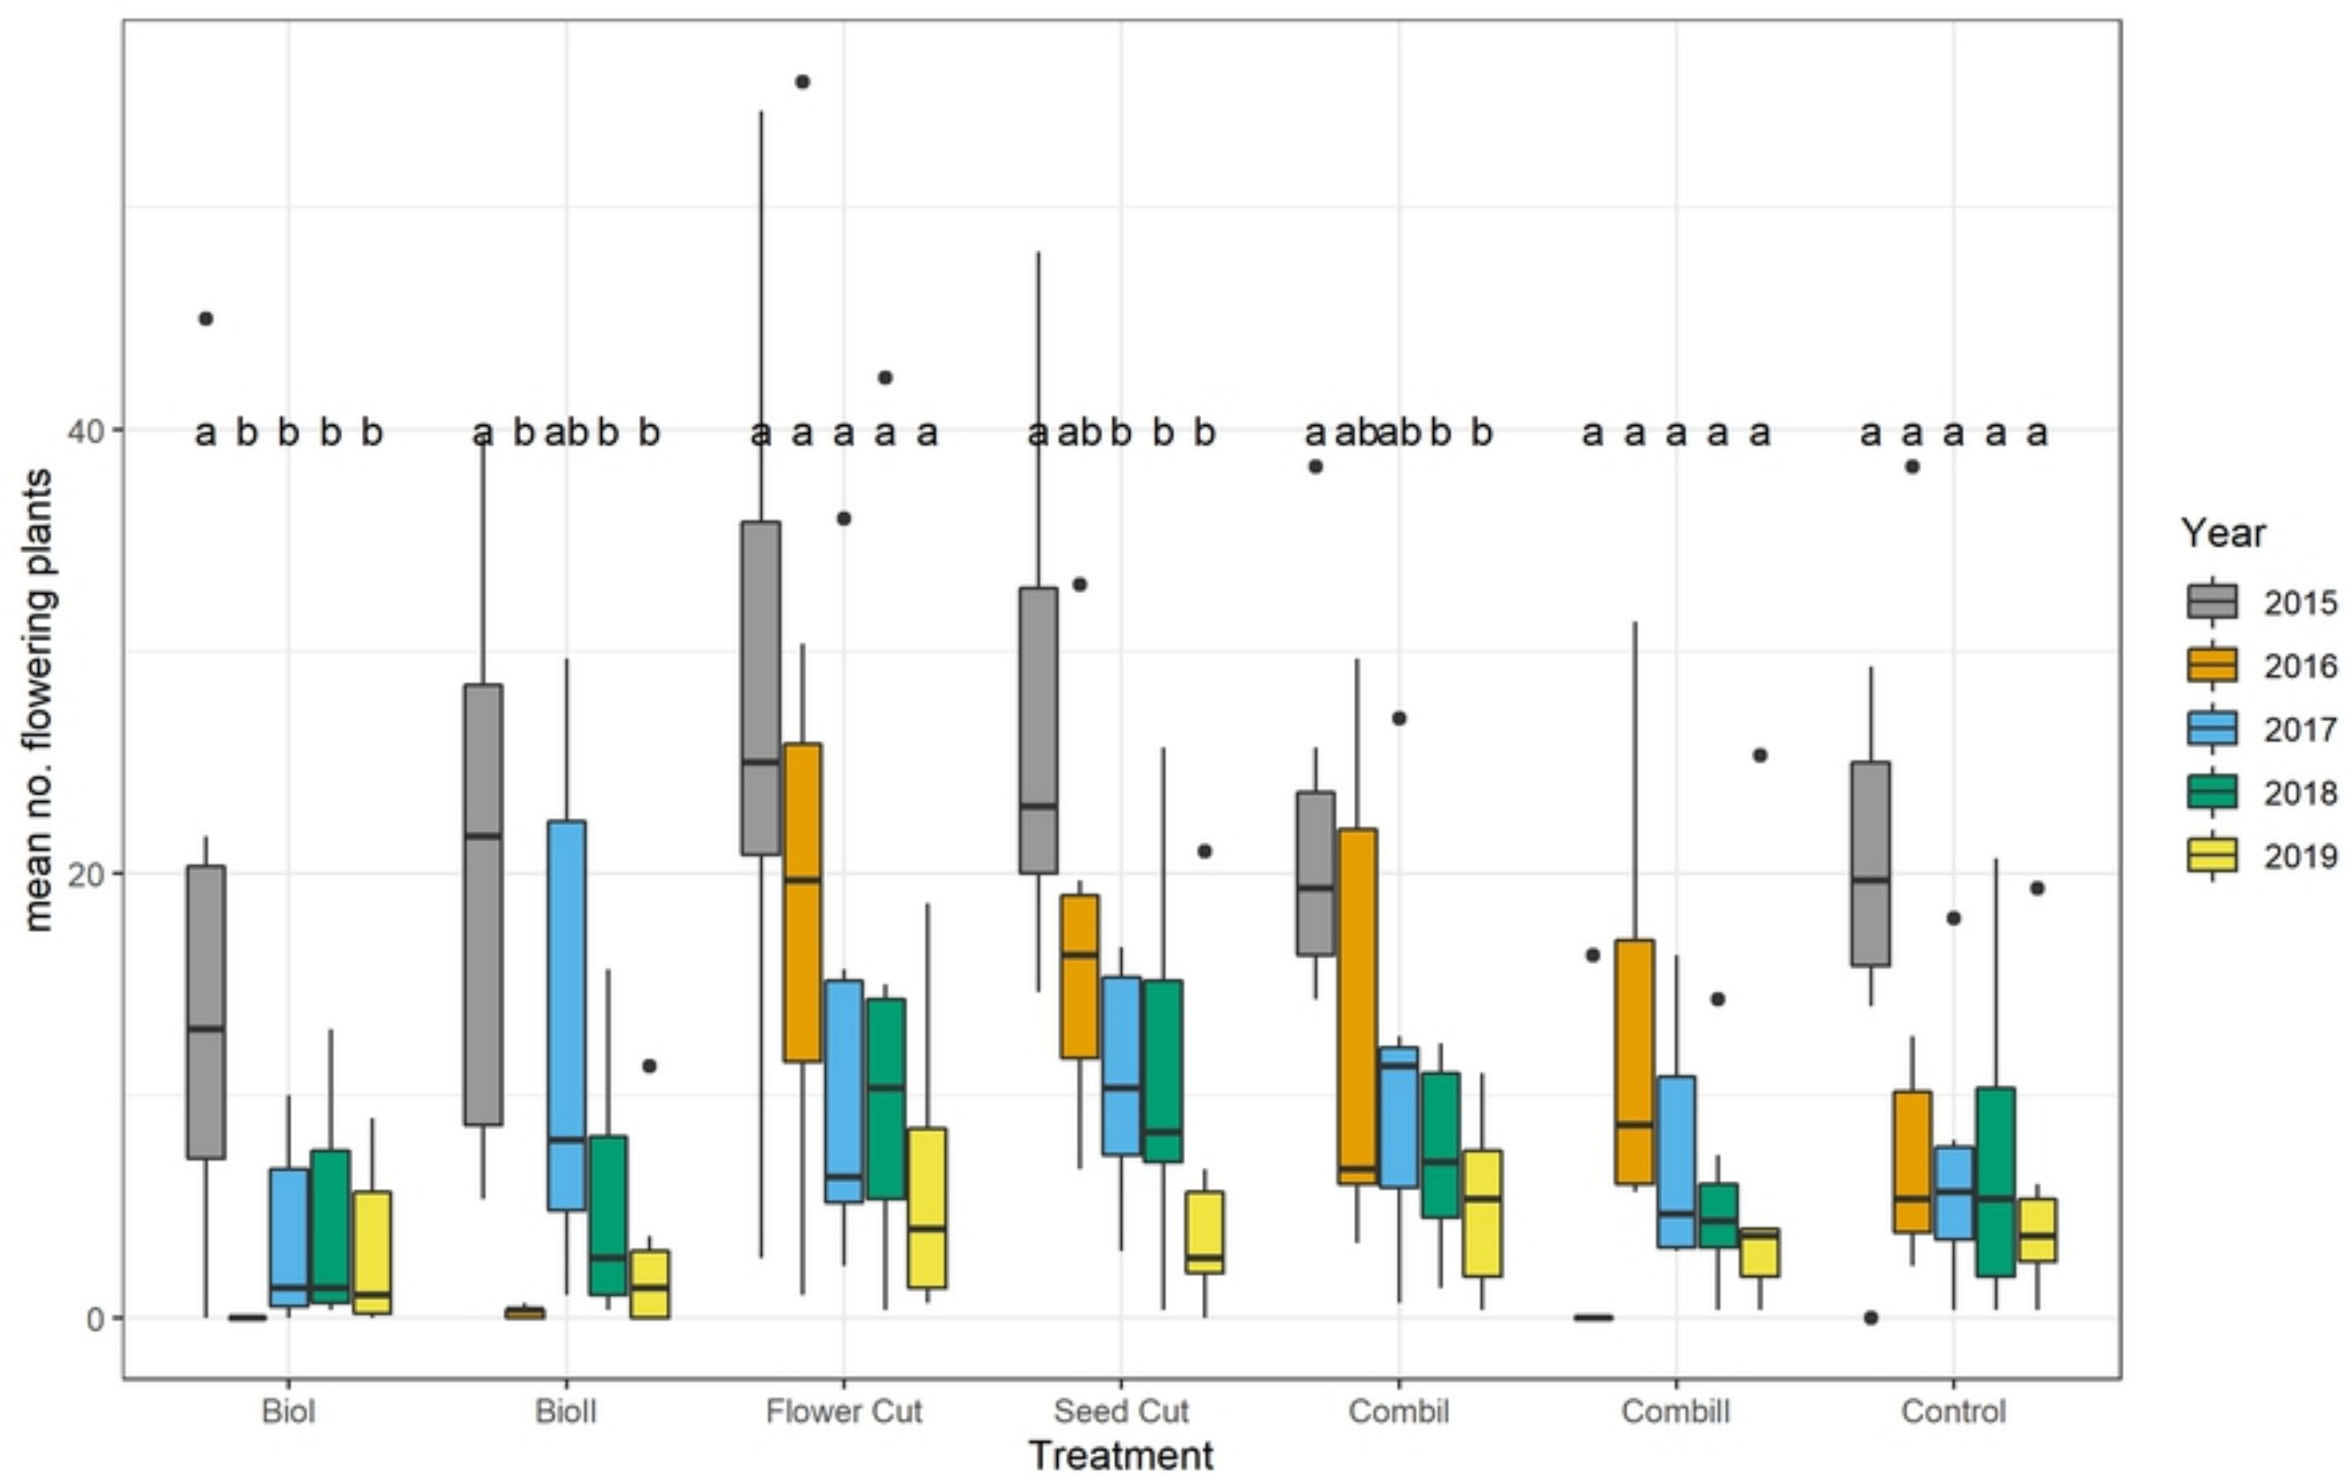

Figure



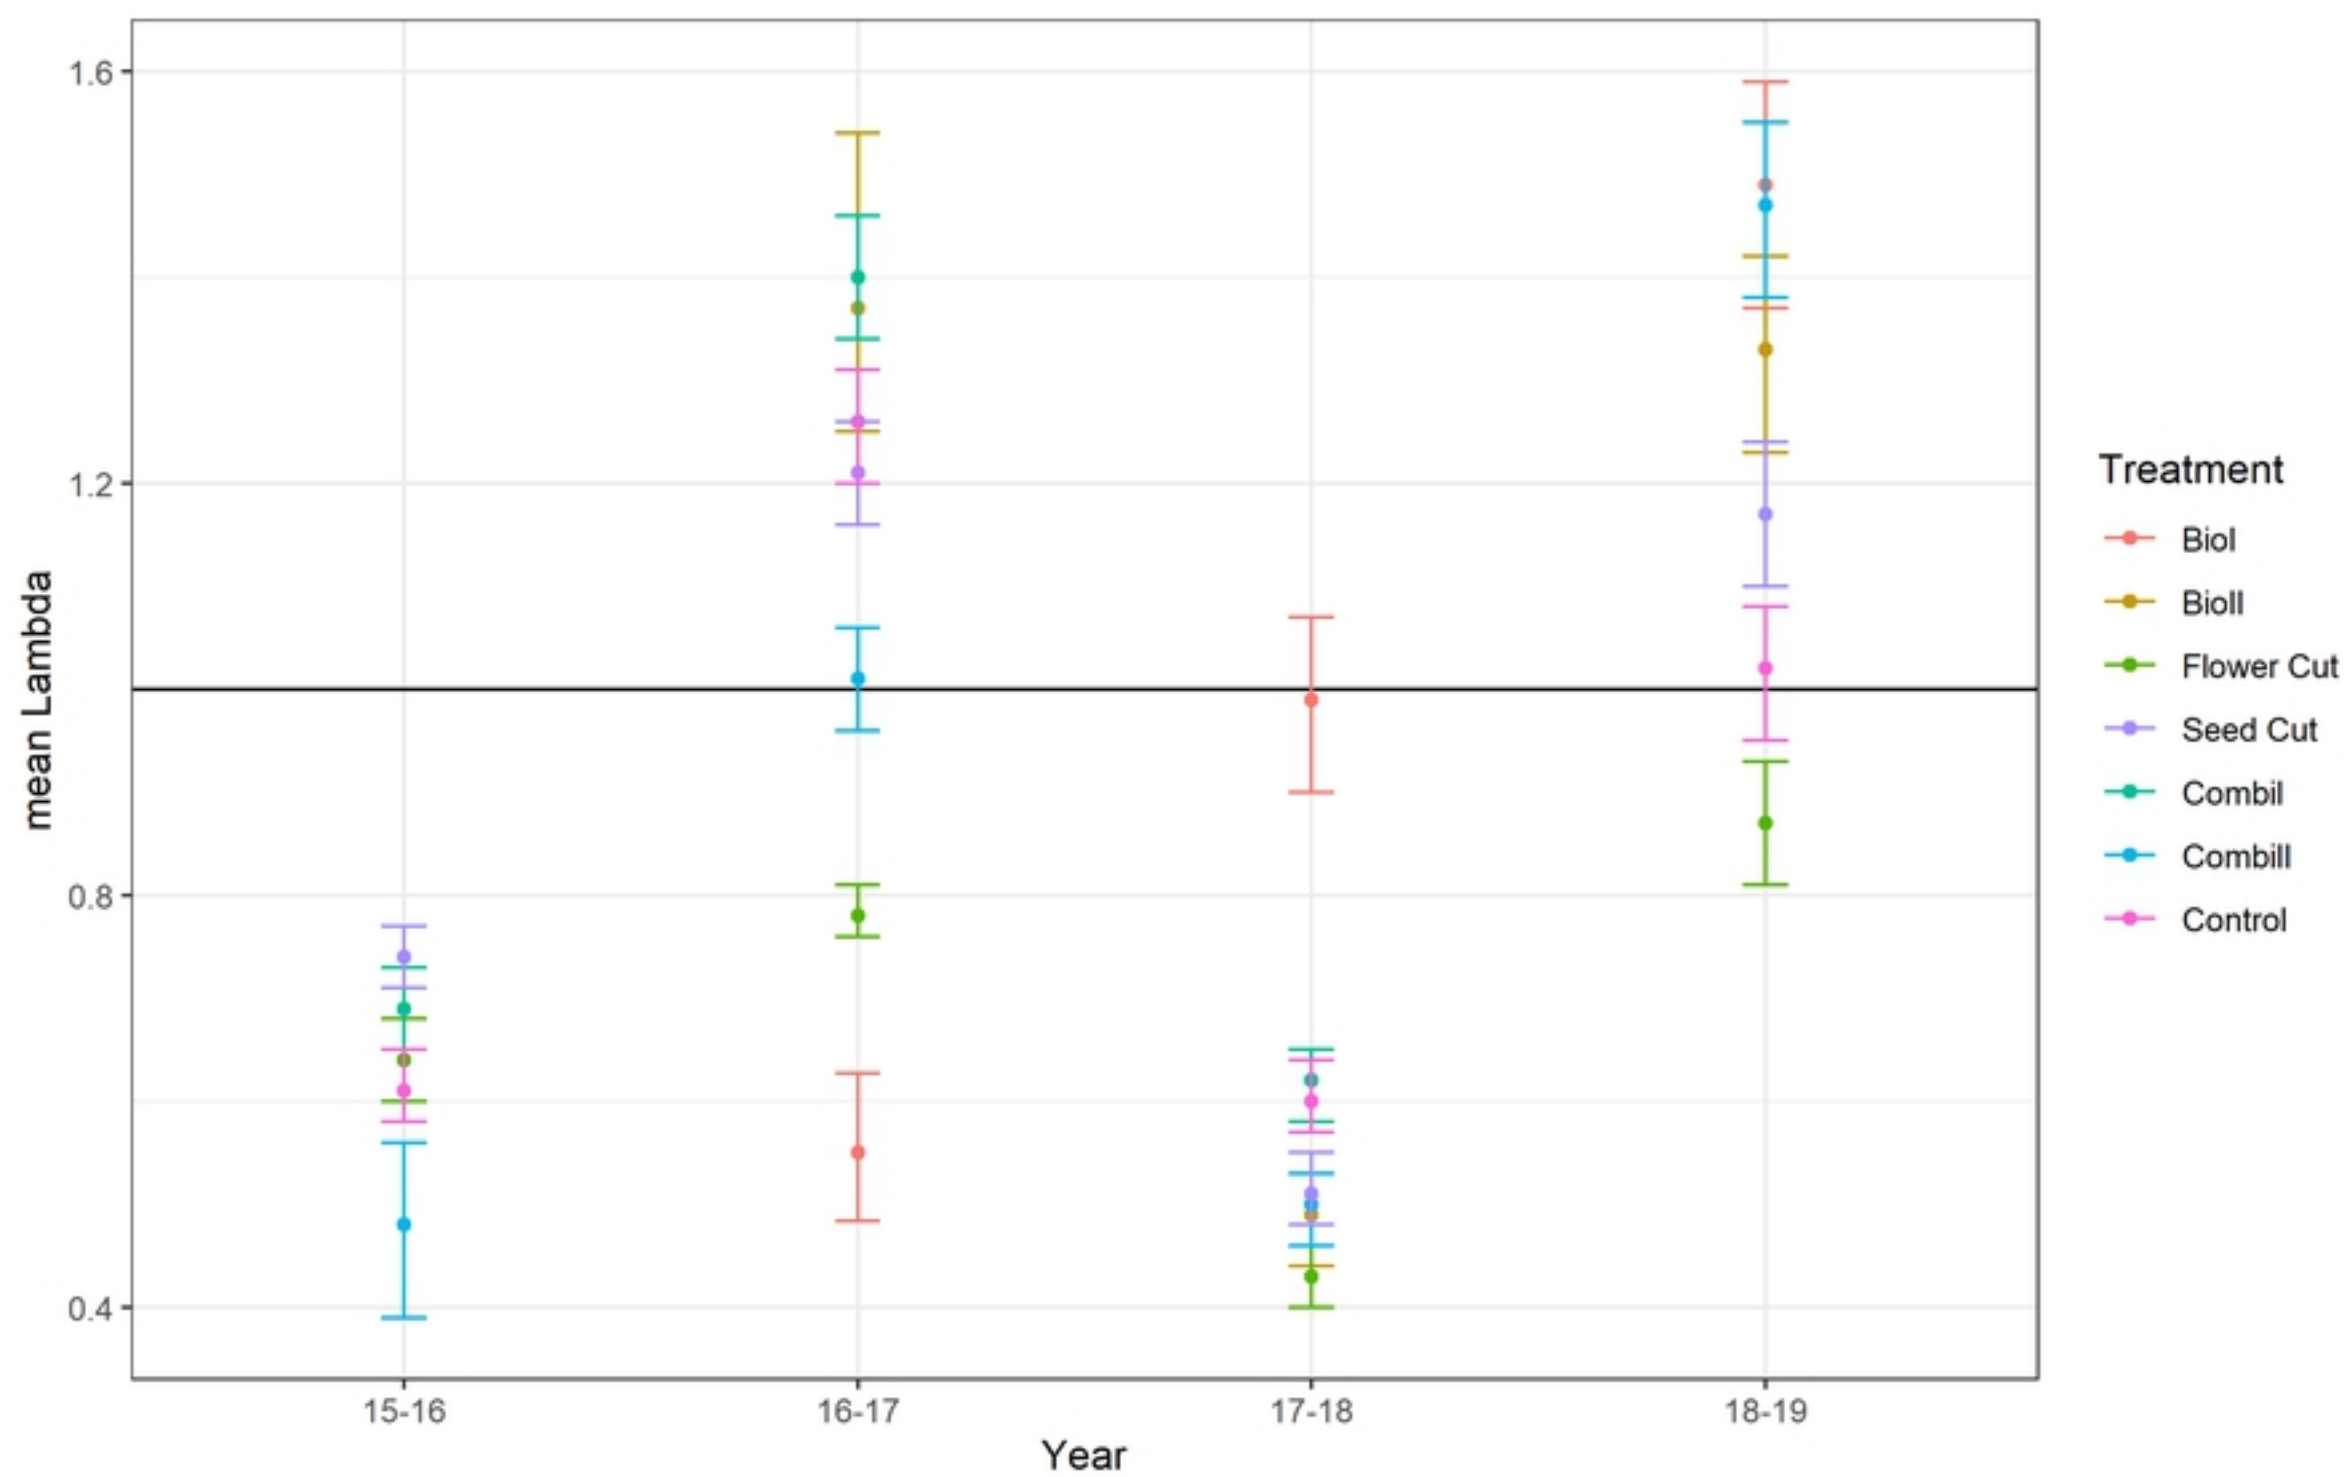

Figure

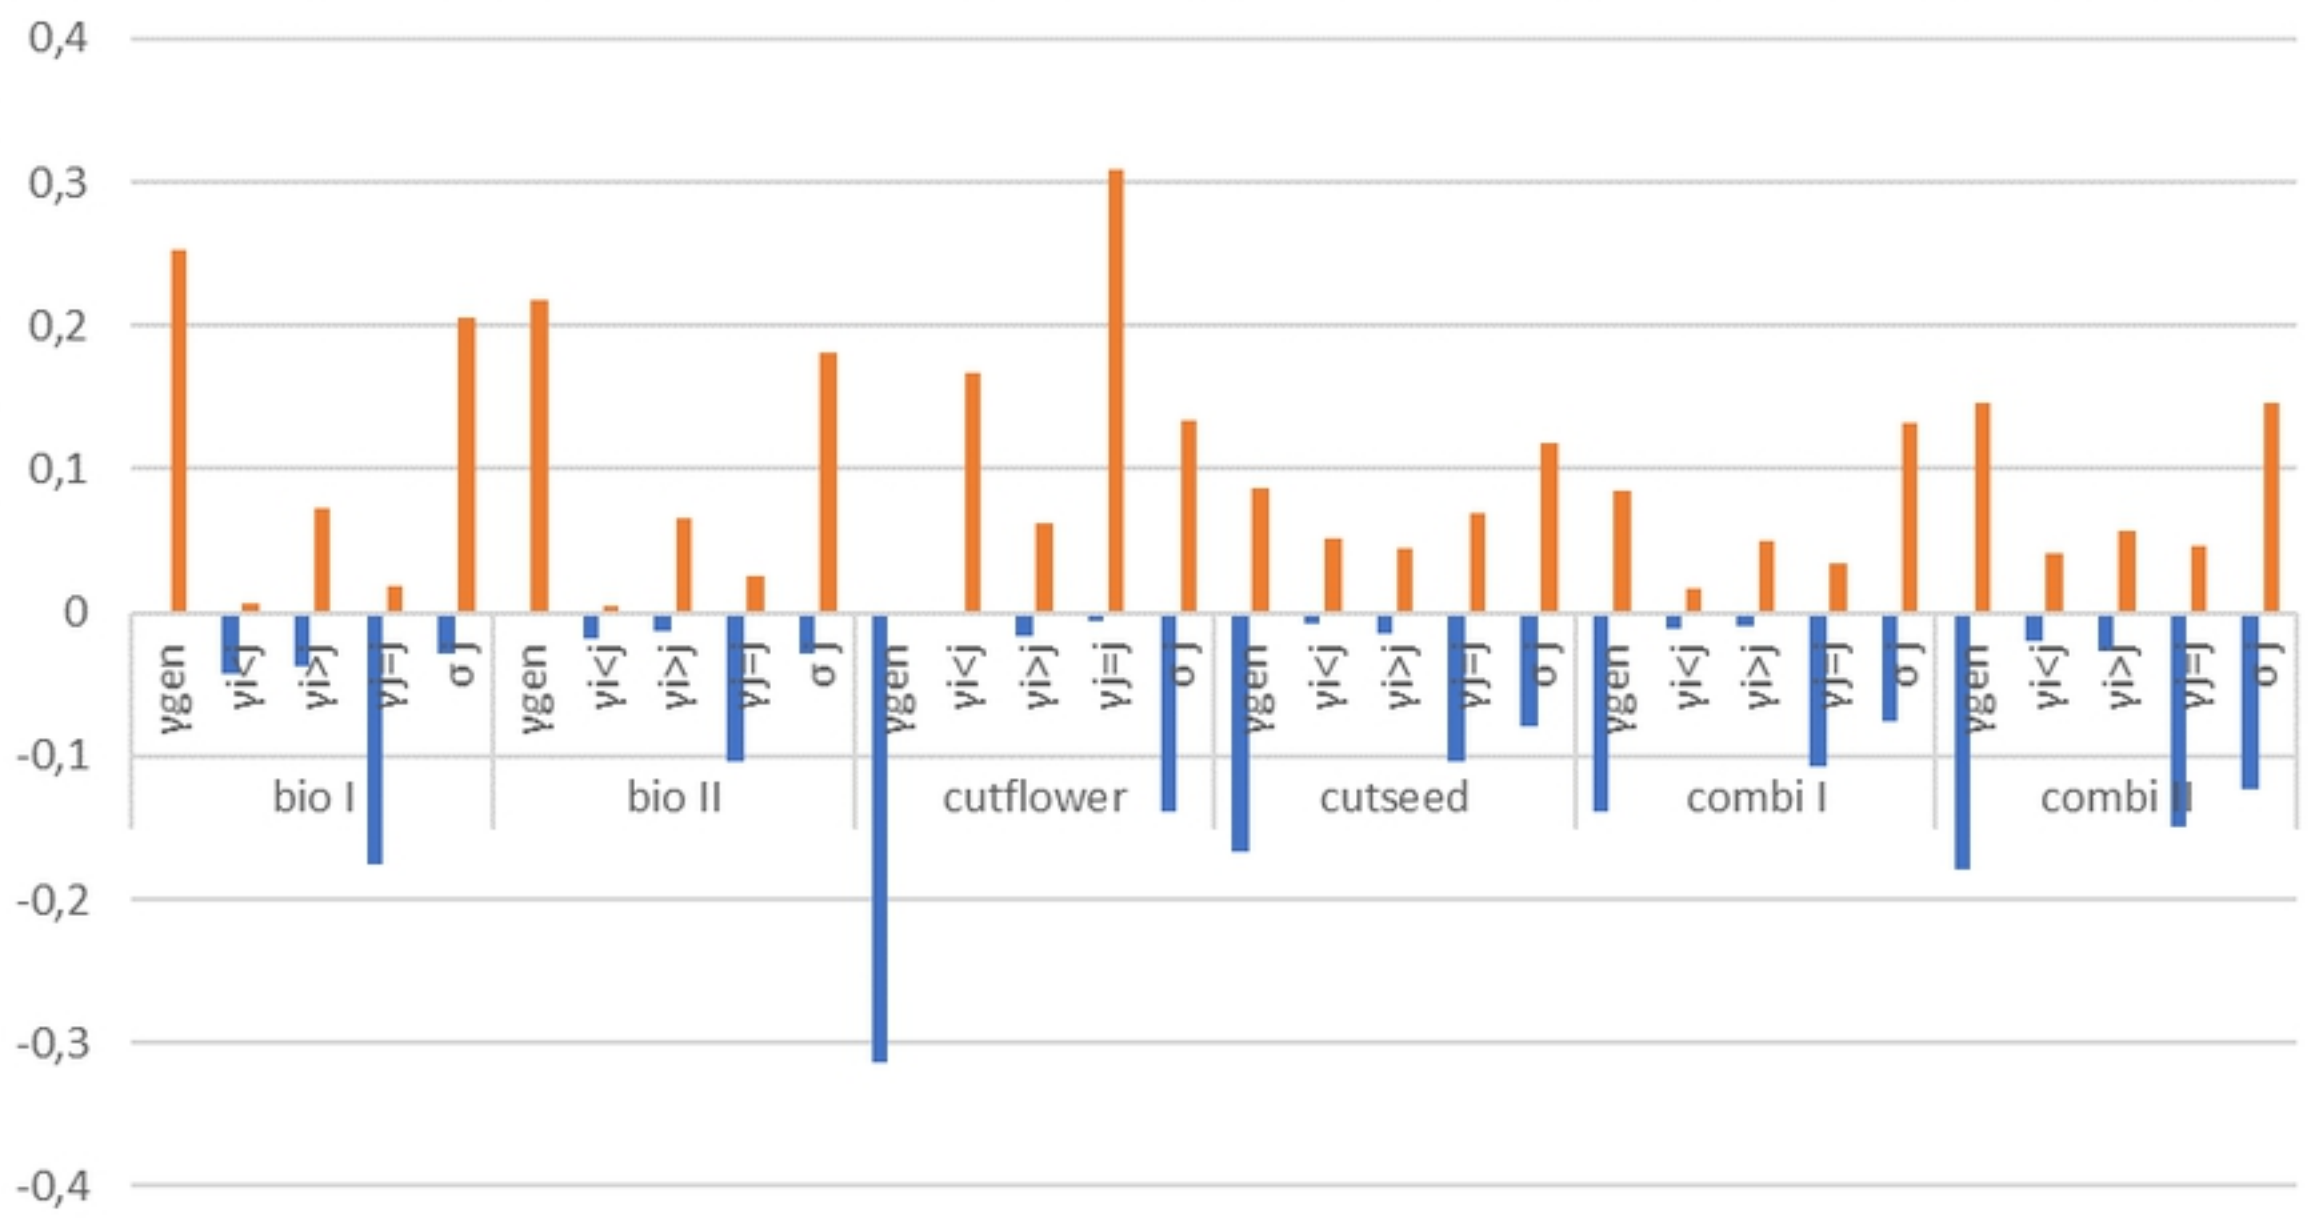

Figure

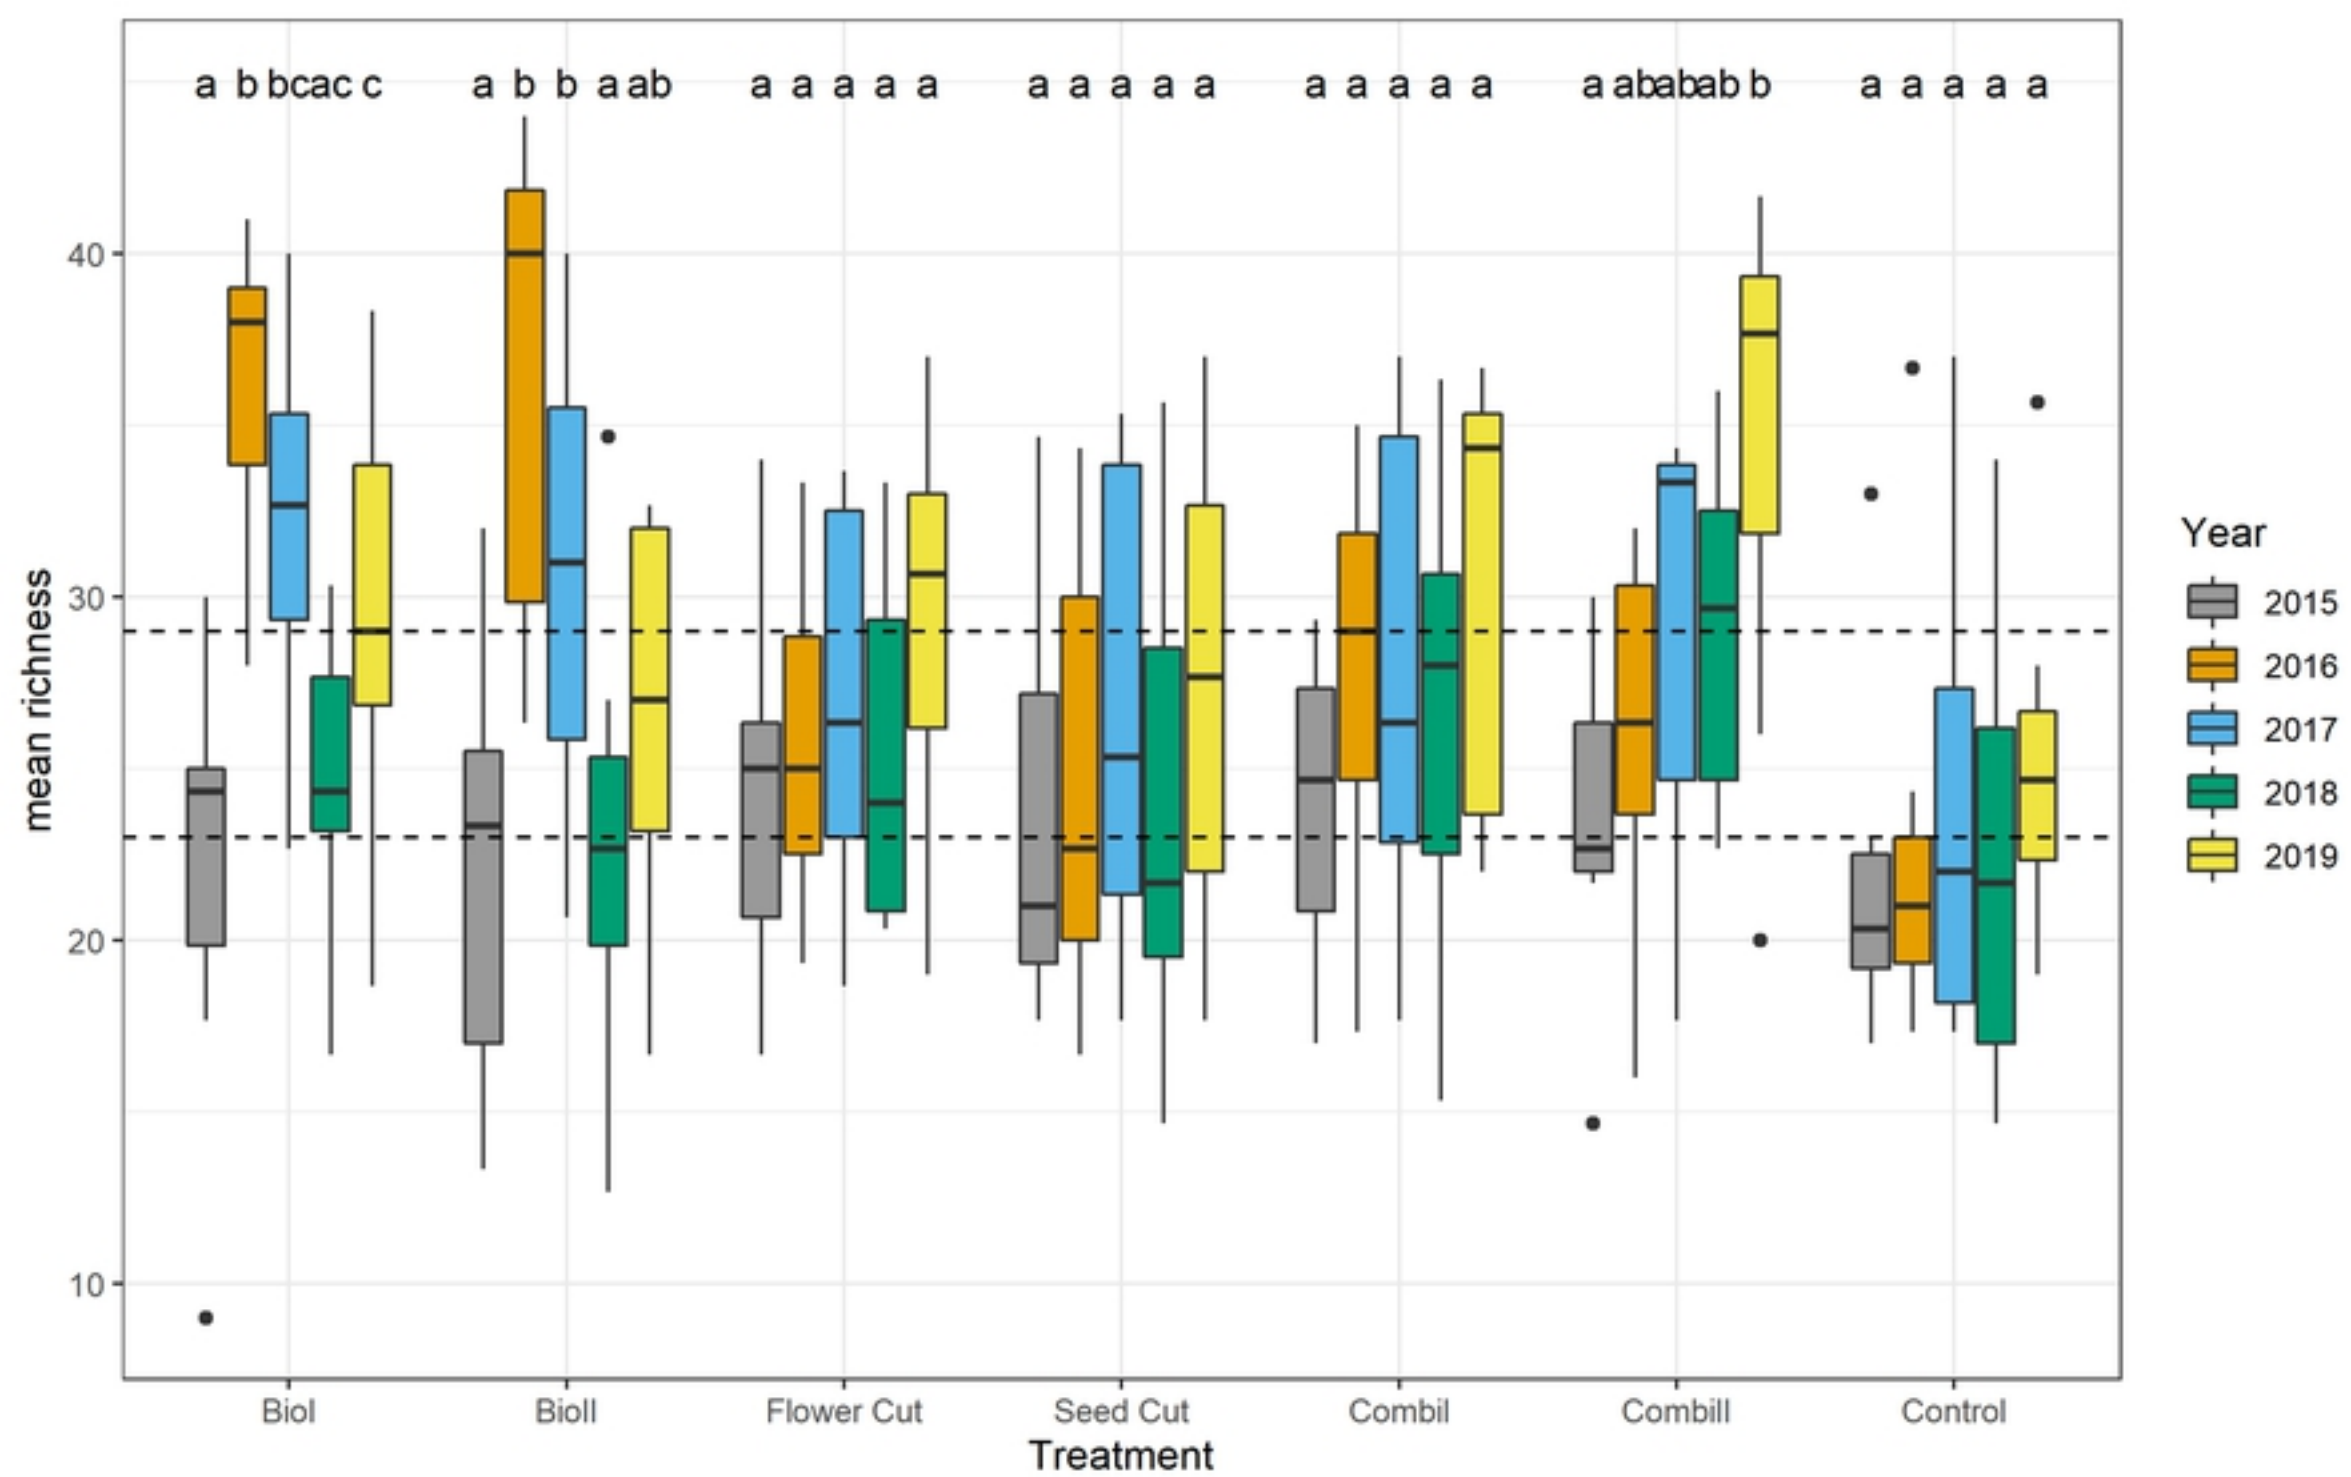

Figure

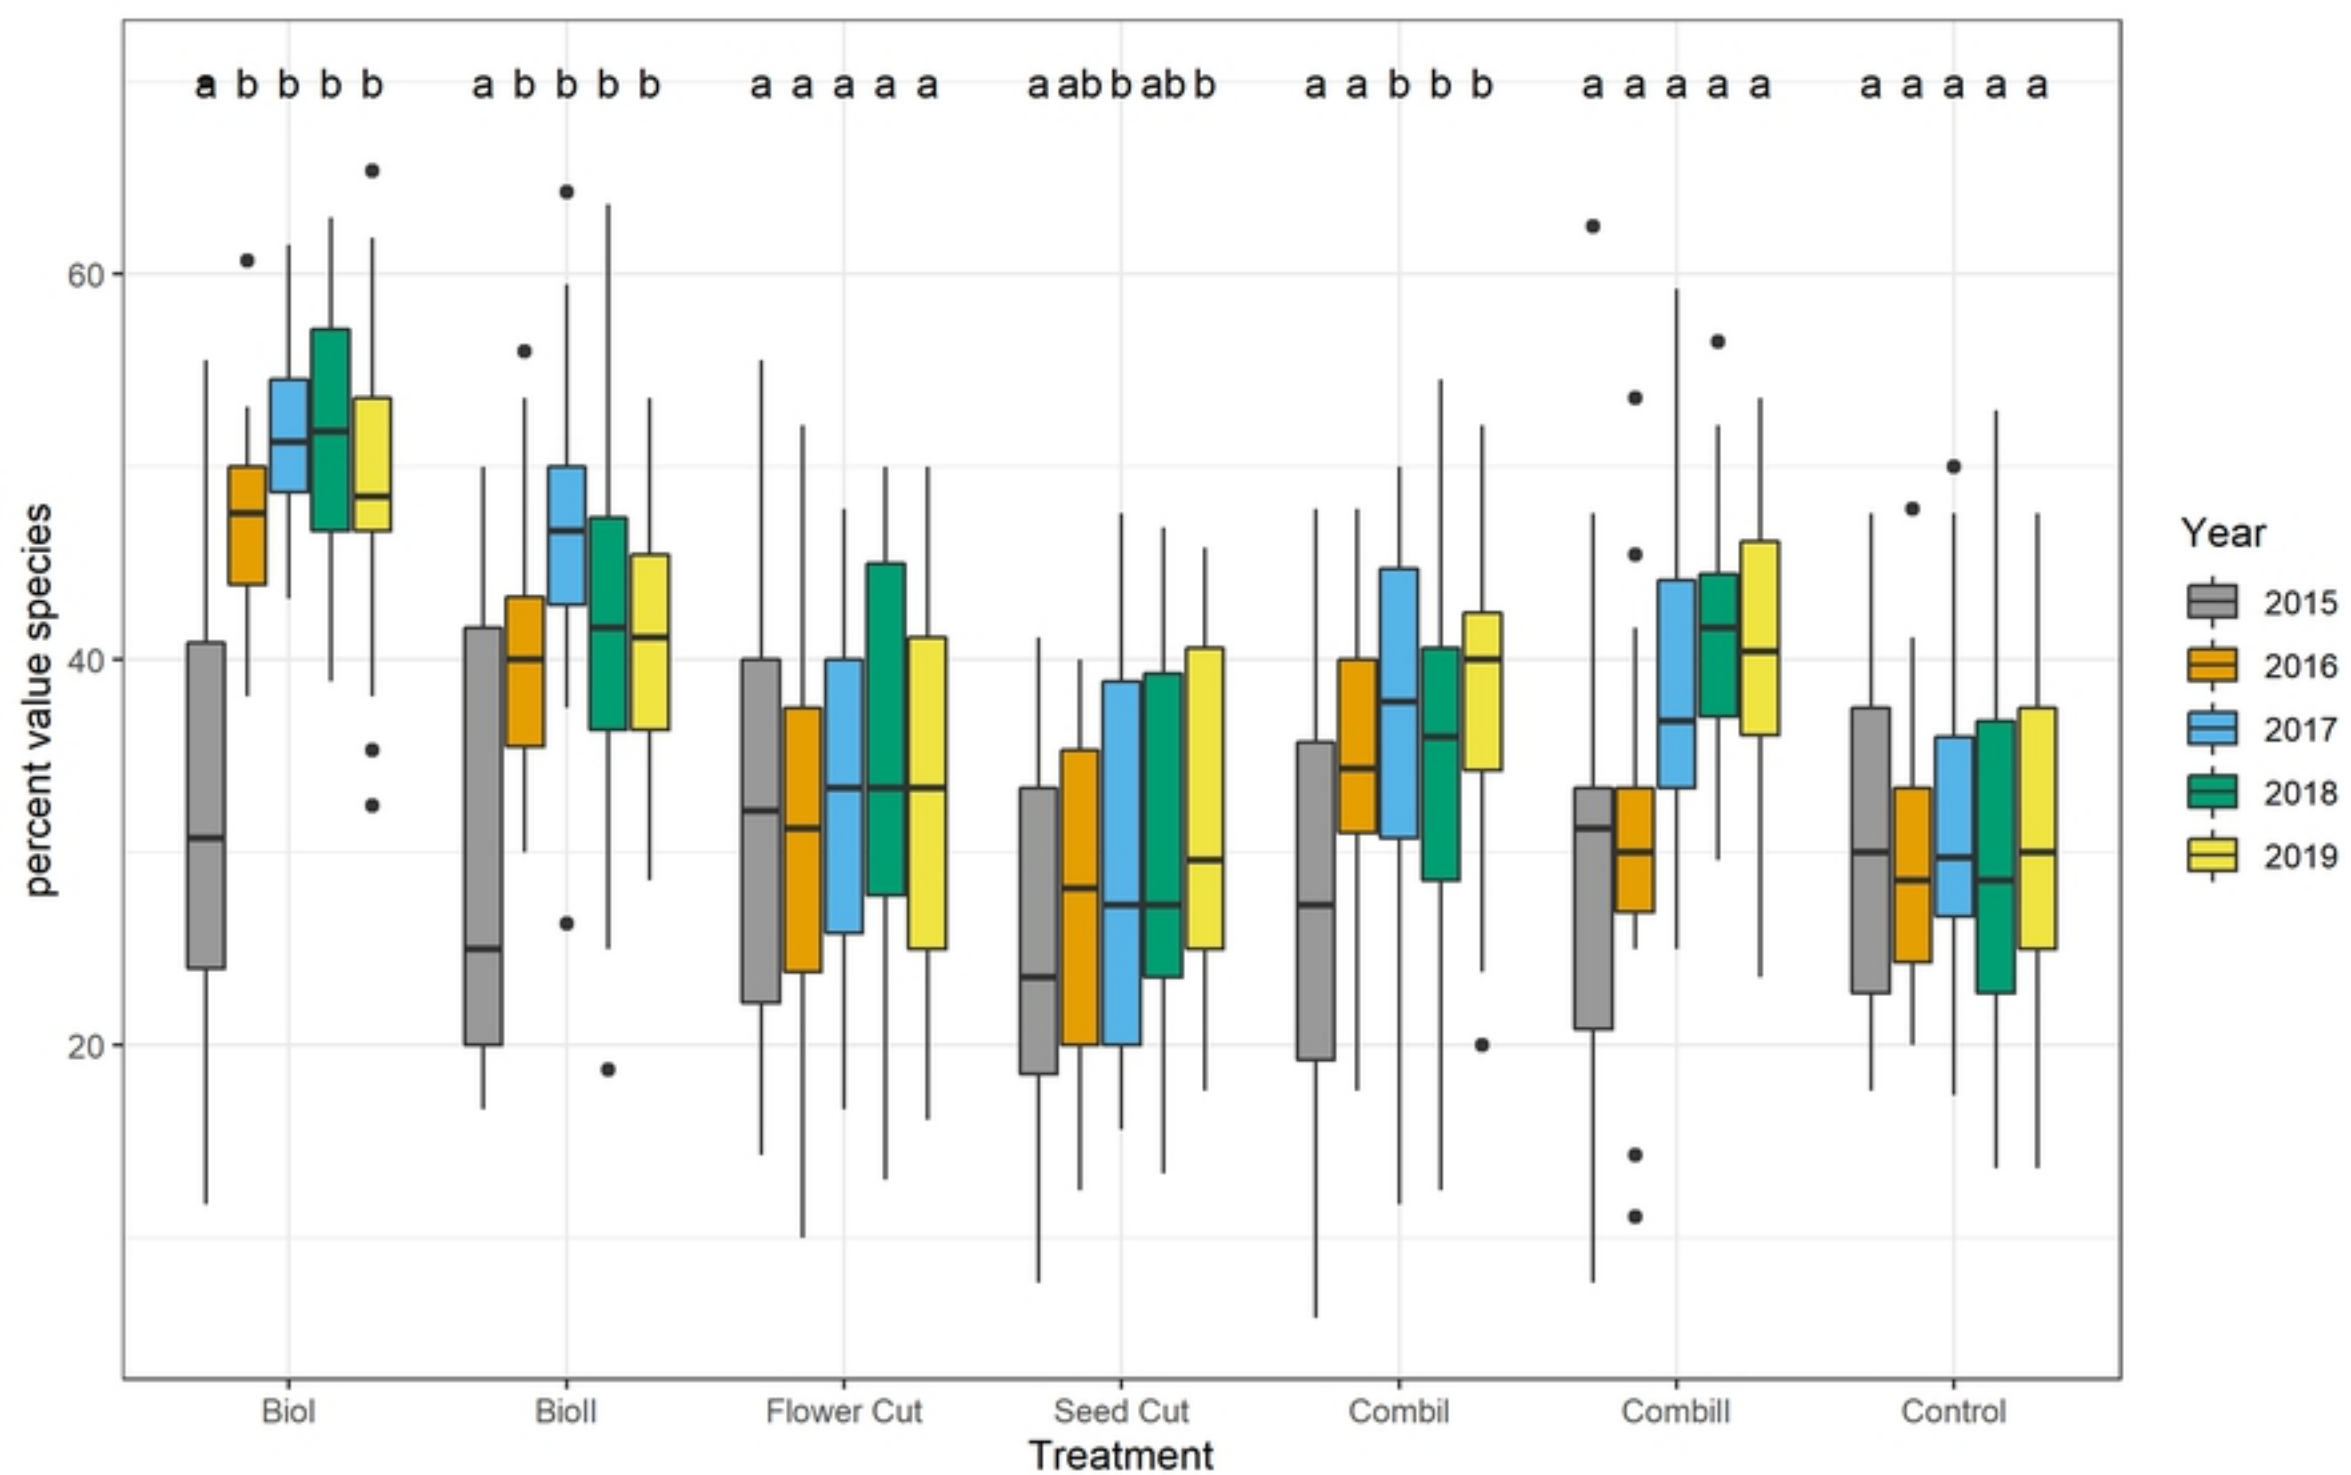

Figure
